# Supplementary material for: Synthesis and anti-proliferative activity evaluation of novel 1,4-naphthoquinones possessing pyrido[2,3-d]pyrimidine scaffolds
Source: Royal Society of Chemistry journal article supplement (doi:10.1039/c6ra17032c), 2016-01-01
Supplement: c6ra17032c1.pdf [file c6ra17032c1.pdf]

# **Synthesis and anti-proliferative activity evaluation of novel 1,4-naphthoquinones possessing pyrido[2,3-*d*]pyrimidine scaffolds**

**Chong Zhang\*, Guangfei Sun, Qiuju Peng, Shiwei Zhu and Dongxun Nin**

*School of Pharmacy, Xinxiang Medical University, Xinxiang 453003, China*

## **Content**

**Copy of IR, <sup>1</sup>H NMR, <sup>13</sup>C NMR and HRMS.....2-39**

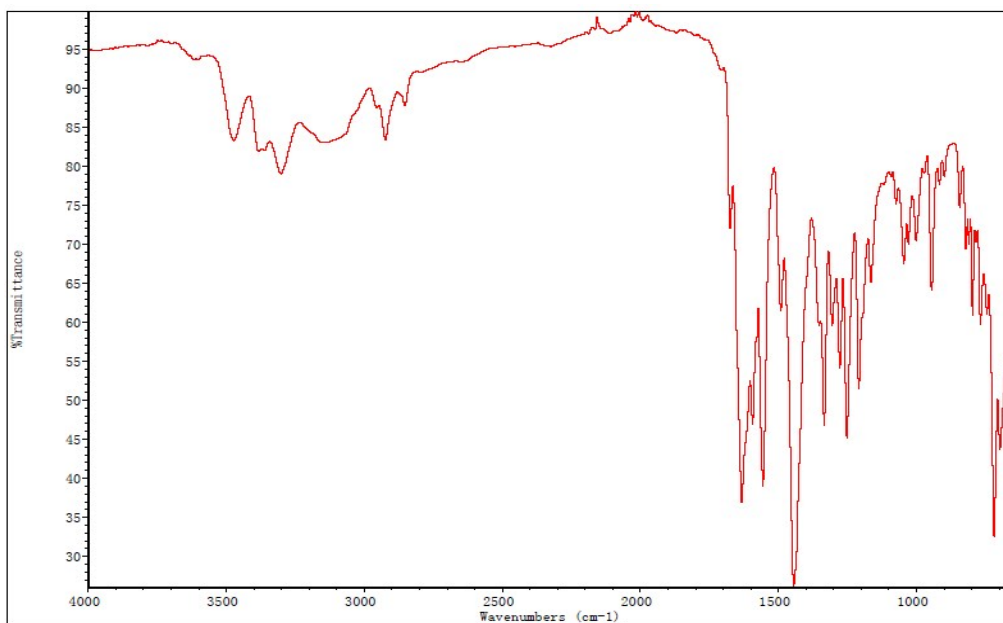

Figure 1 IR of 4a

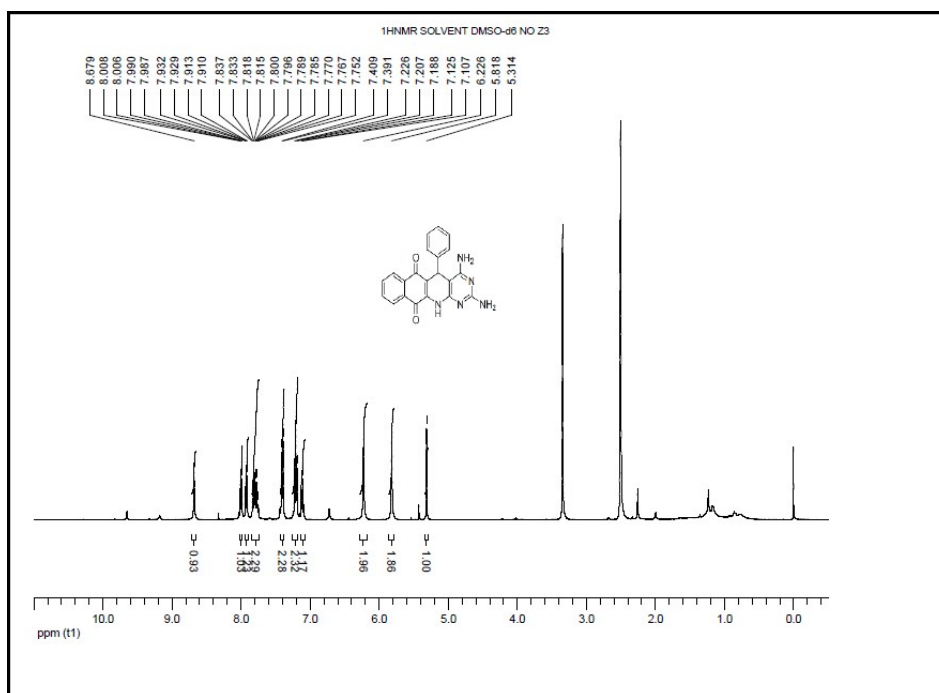

Figure 2 <sup>1</sup>H NMR of 4a

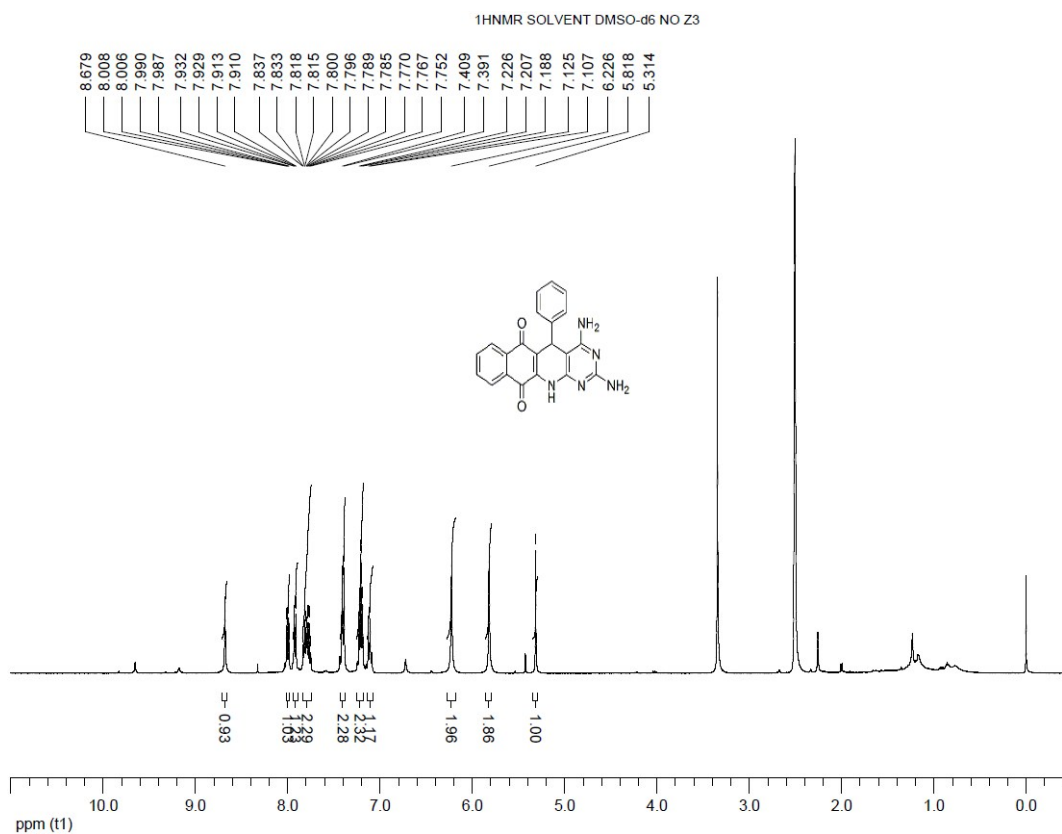

**Figure 3**  $^1\text{H}$  NMR of 4a

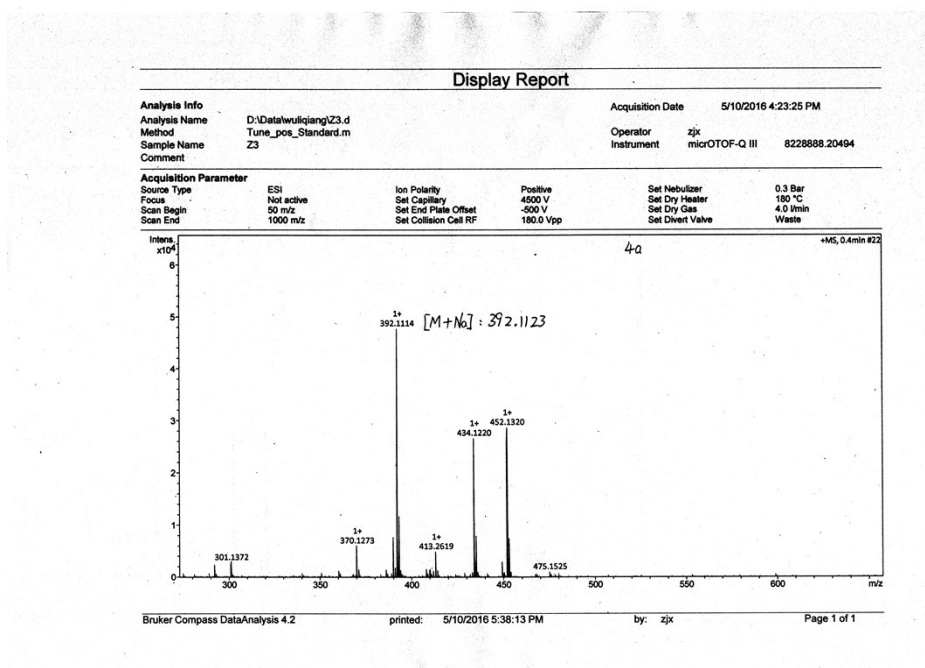

**Figure 4** HRMS of 4a

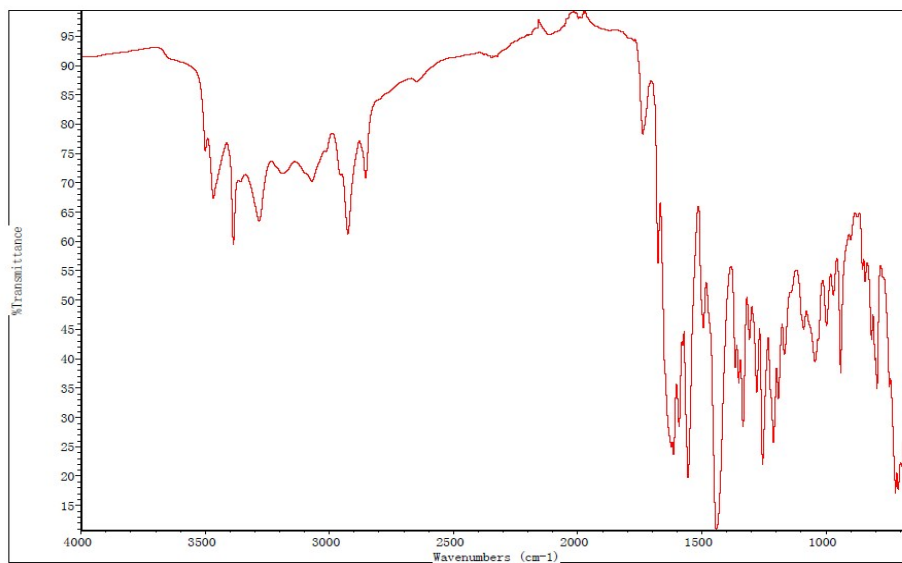

Figure 5 IR of **4b**

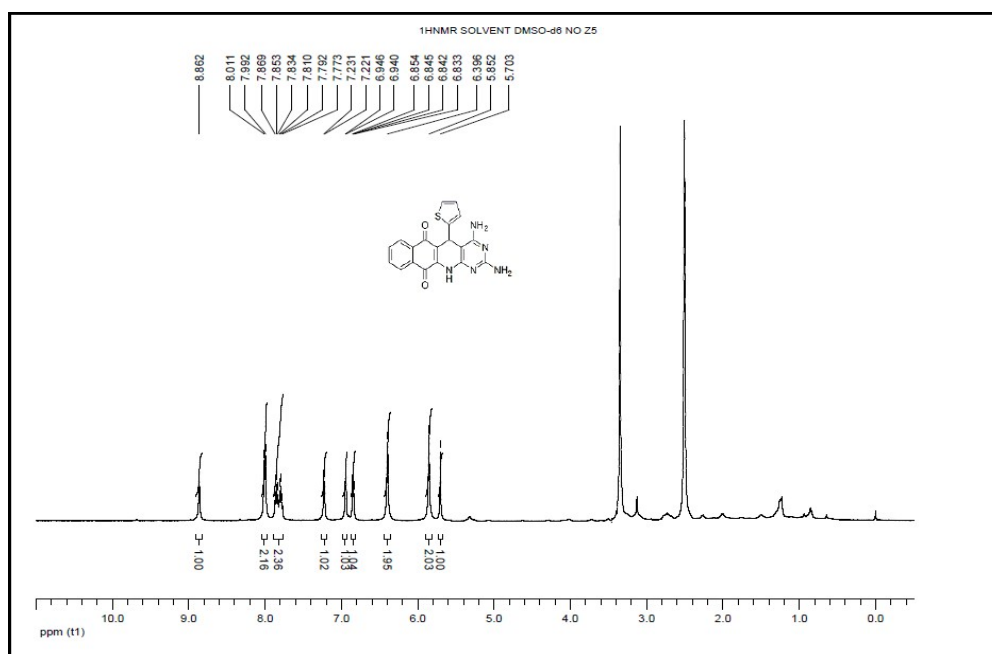

Figure 6  $^1\text{H}$  NMR of **4b**

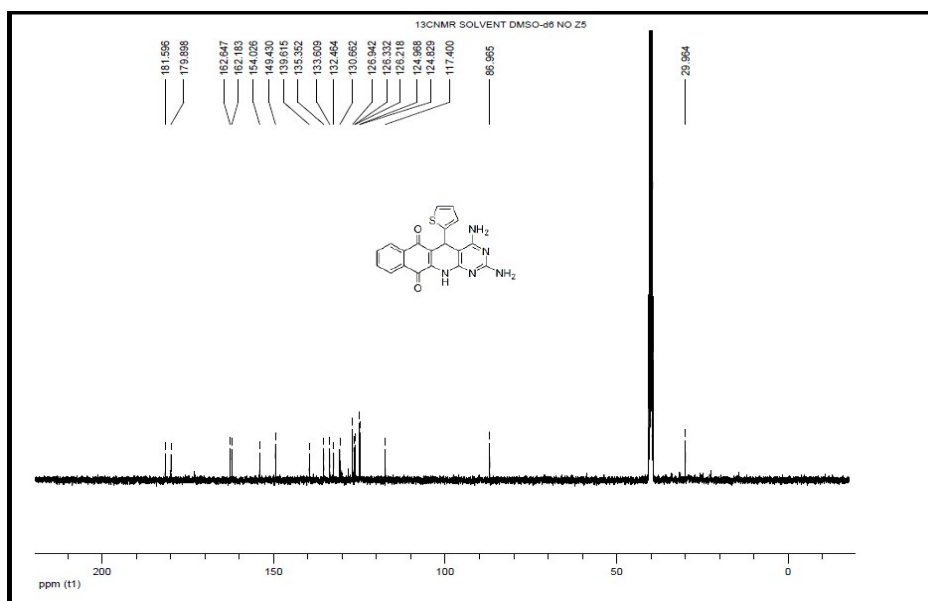

Figure 7  $^{13}\text{C}$  NMR of **4b**

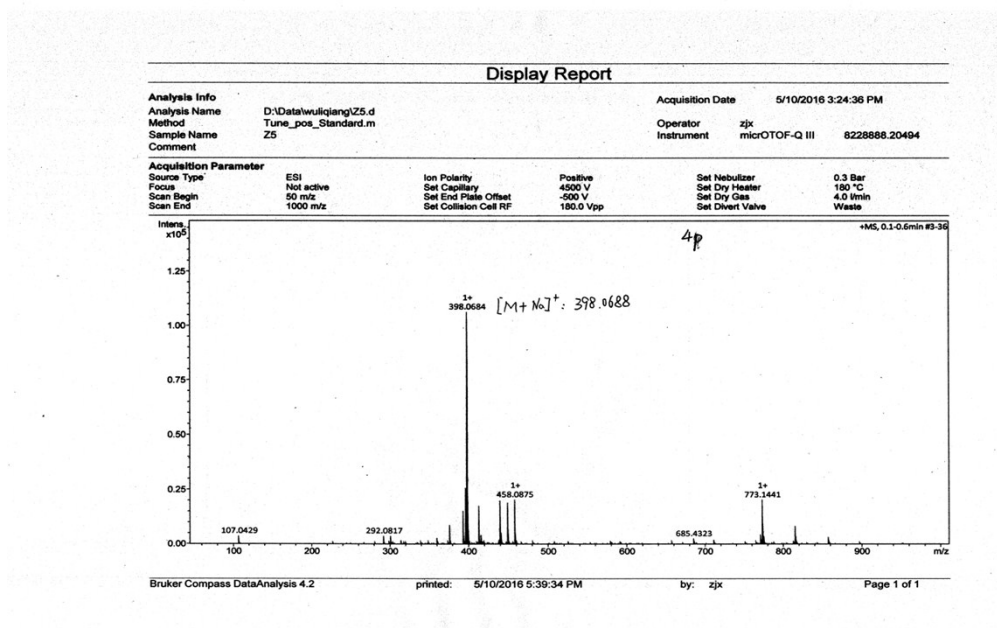

Figure 8 HRMS of **4b**

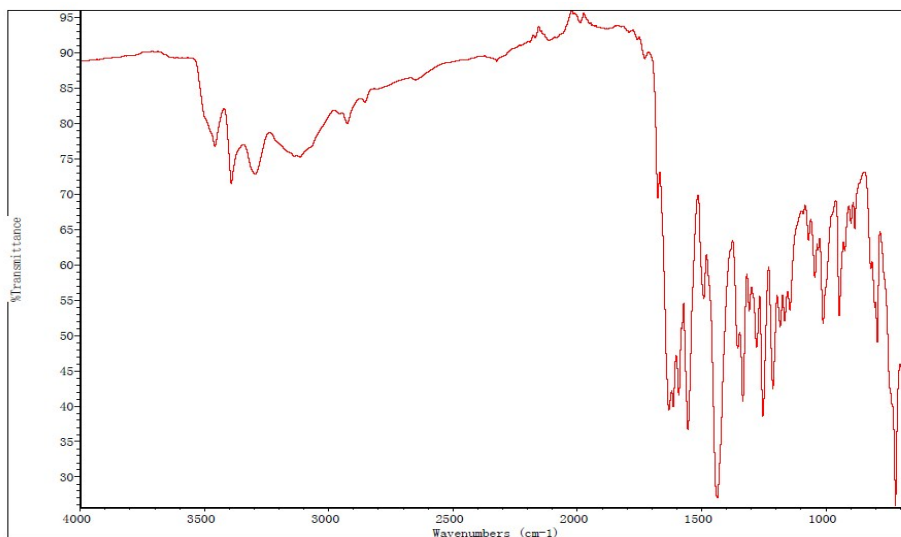

Figure 9 IR of 4c

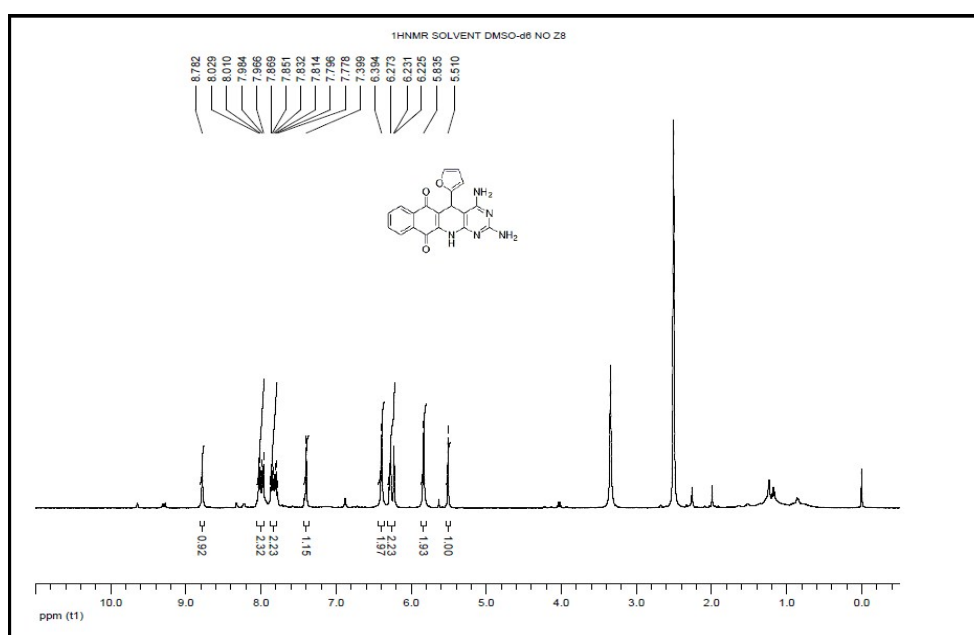

Figure 10 <sup>1</sup>H NMR of 4c

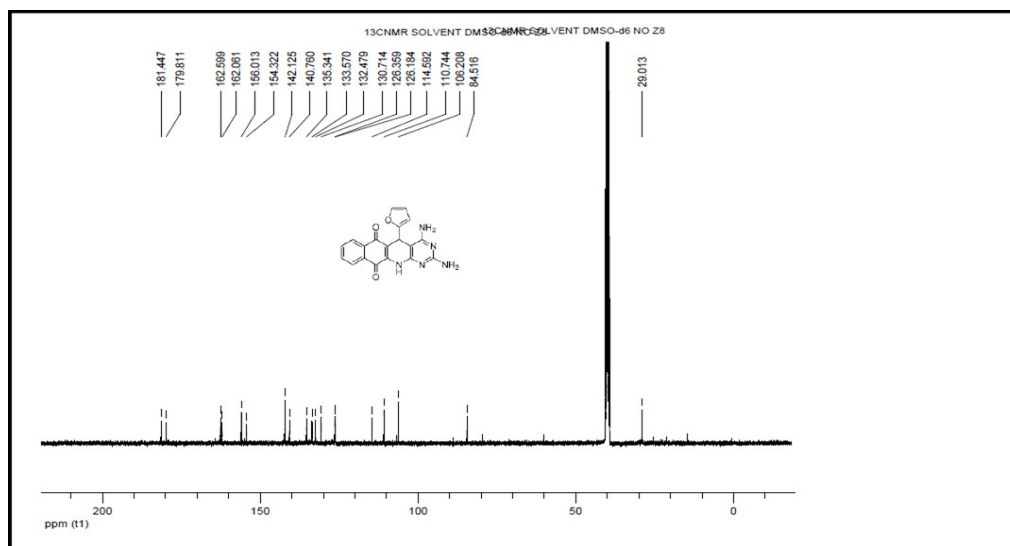

Figure 11 <sup>13</sup>C NMR of 4c

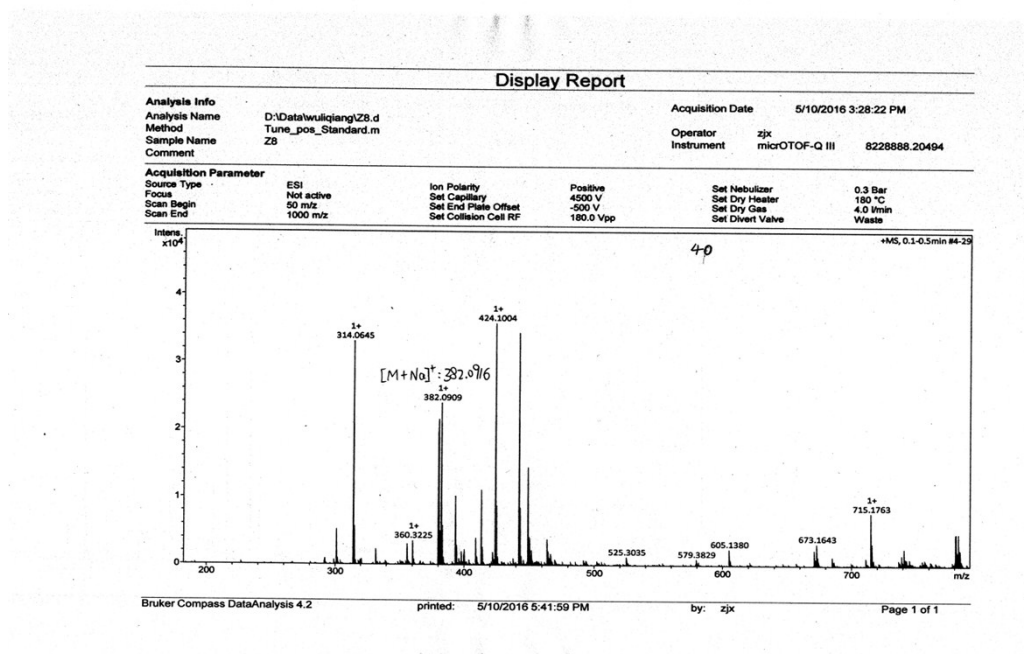

Figure 12 HRMS of 4c

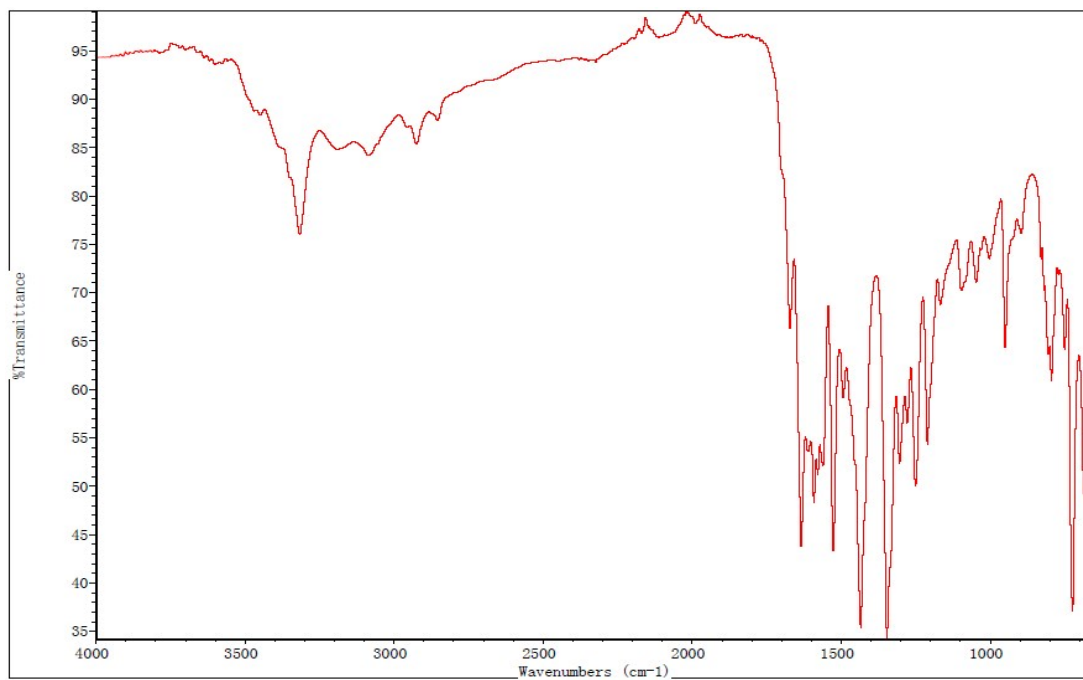

Figure 13 IR of 4d

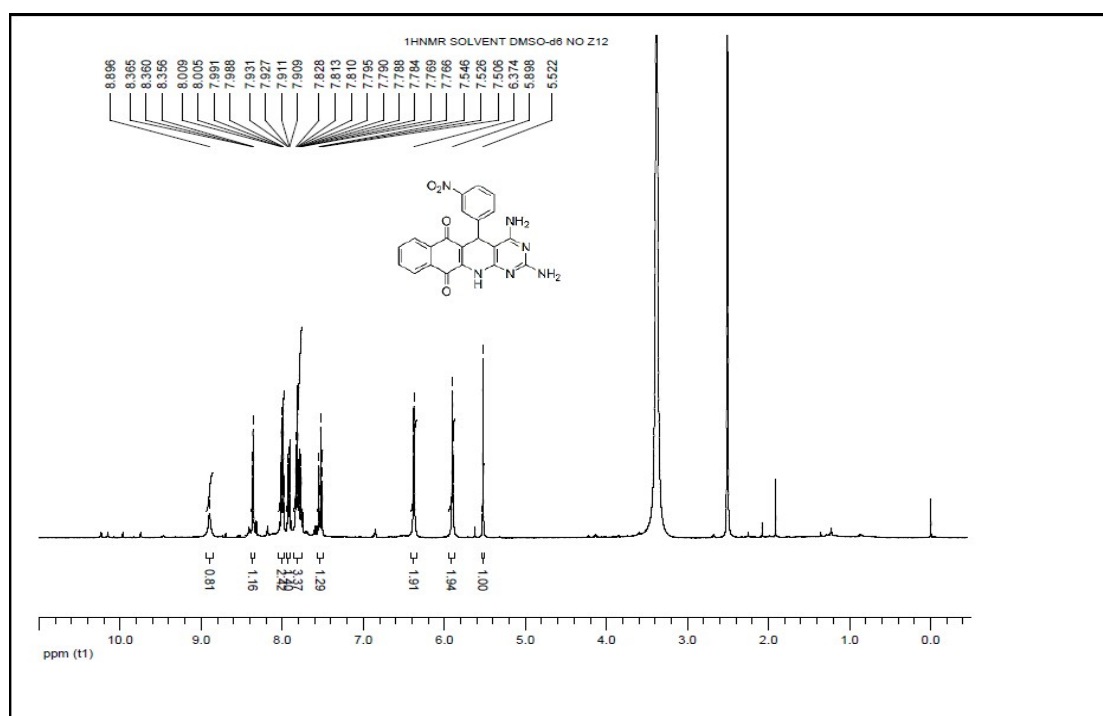

Figure 14 <sup>1</sup>H NMR of 4d



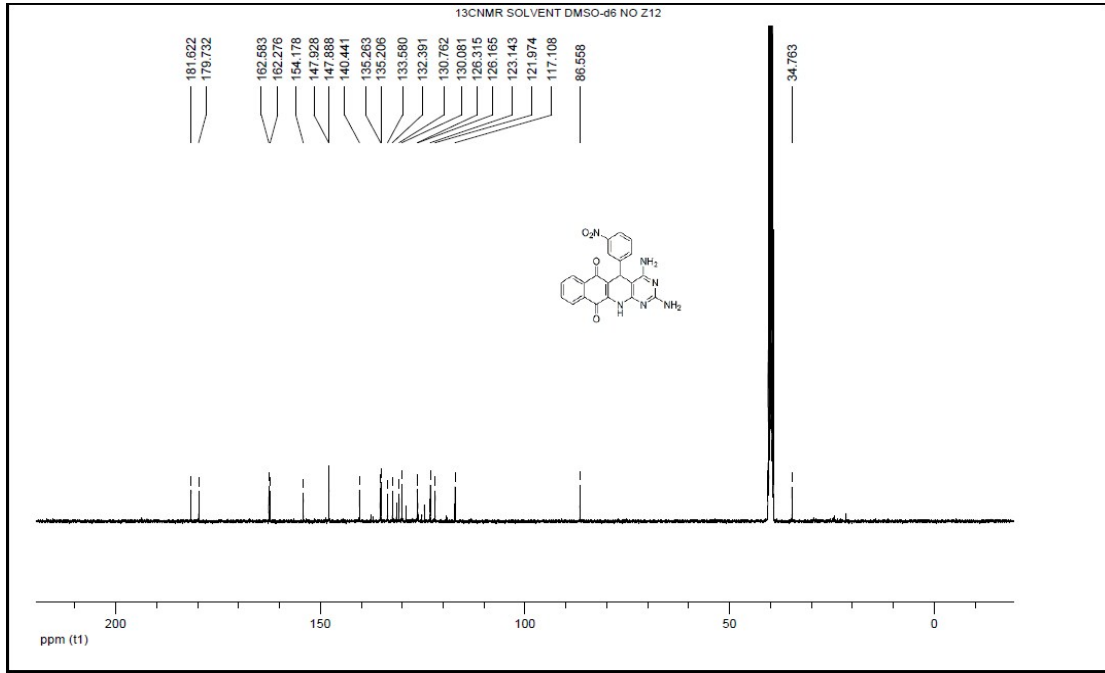

Figure 15 <sup>13</sup>C NMR of 4d

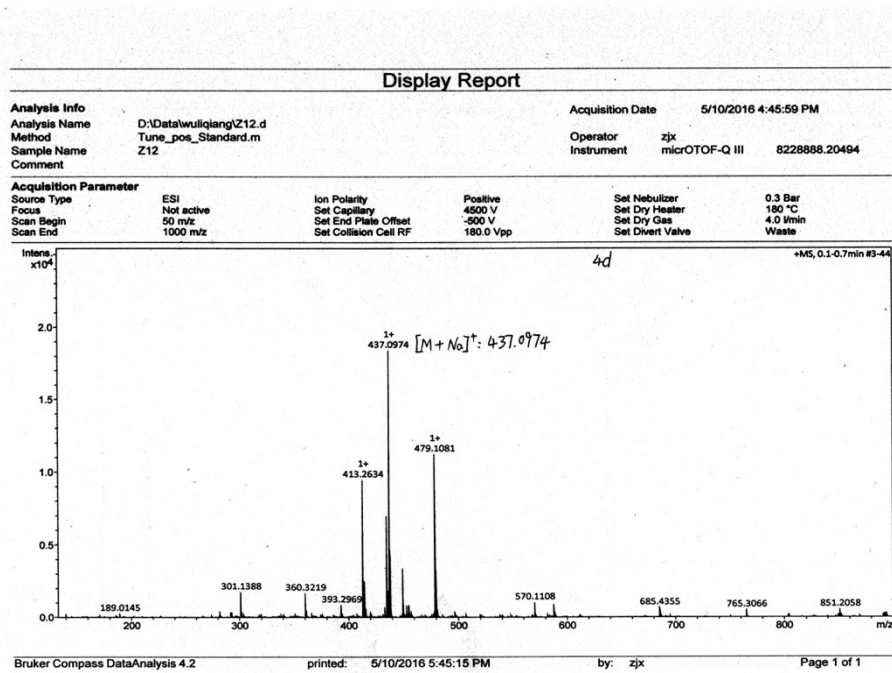

Figure 16 HRMS of 4d

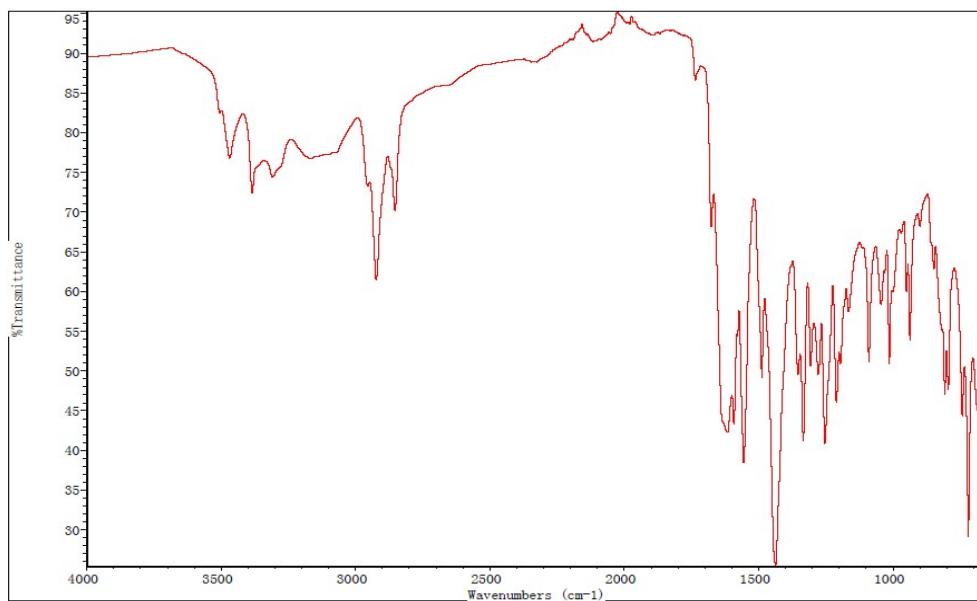

Figure 17 IR of 4e

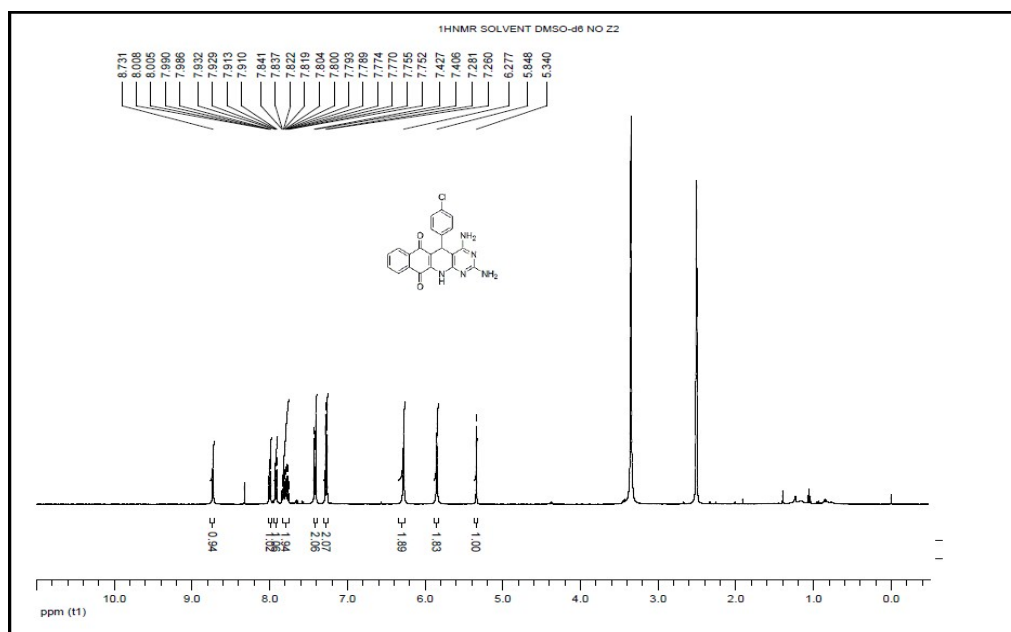

Figure 18 <sup>1</sup>H NMR of 4e

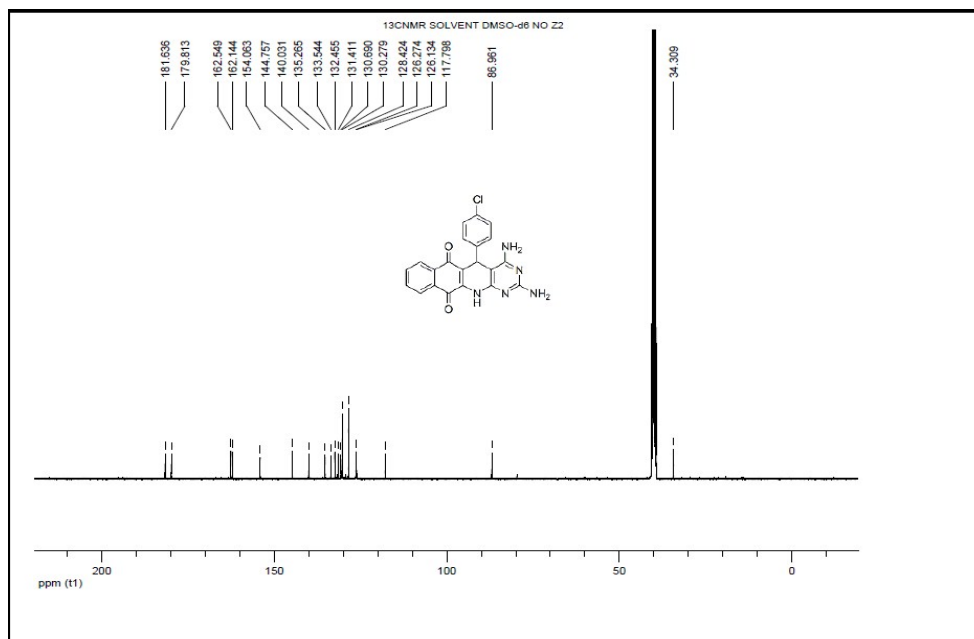

Figure 19  $^{13}\text{C}$  NMR of 4e

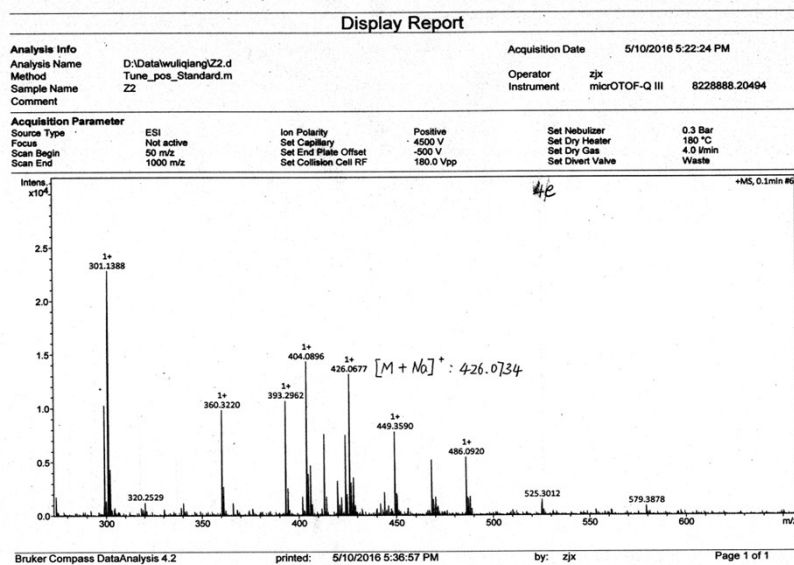

Figure 20 HRMS of 4e

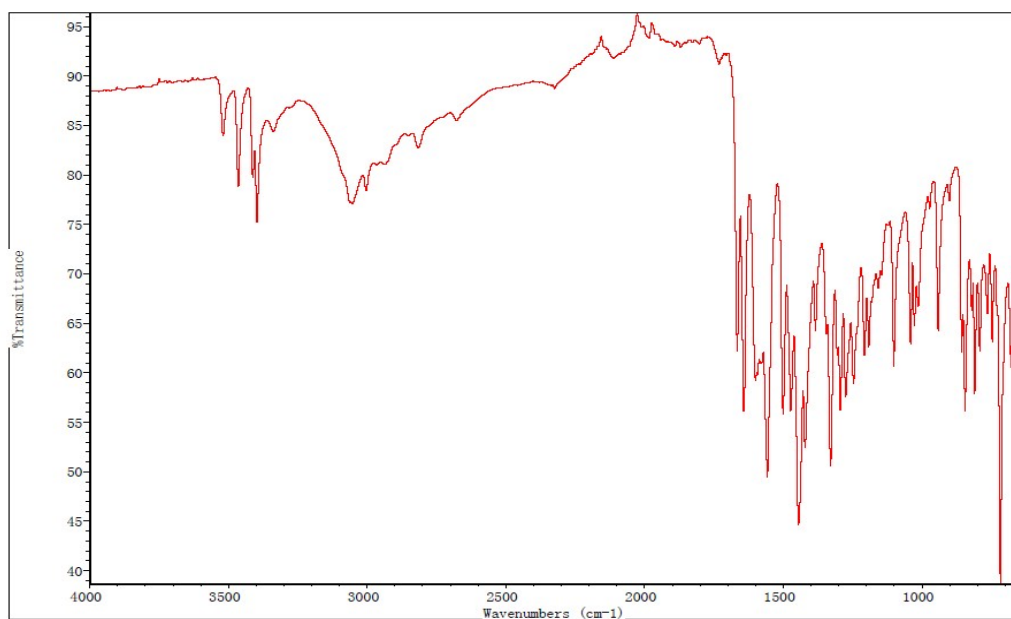

Figure 21 IR of 4f

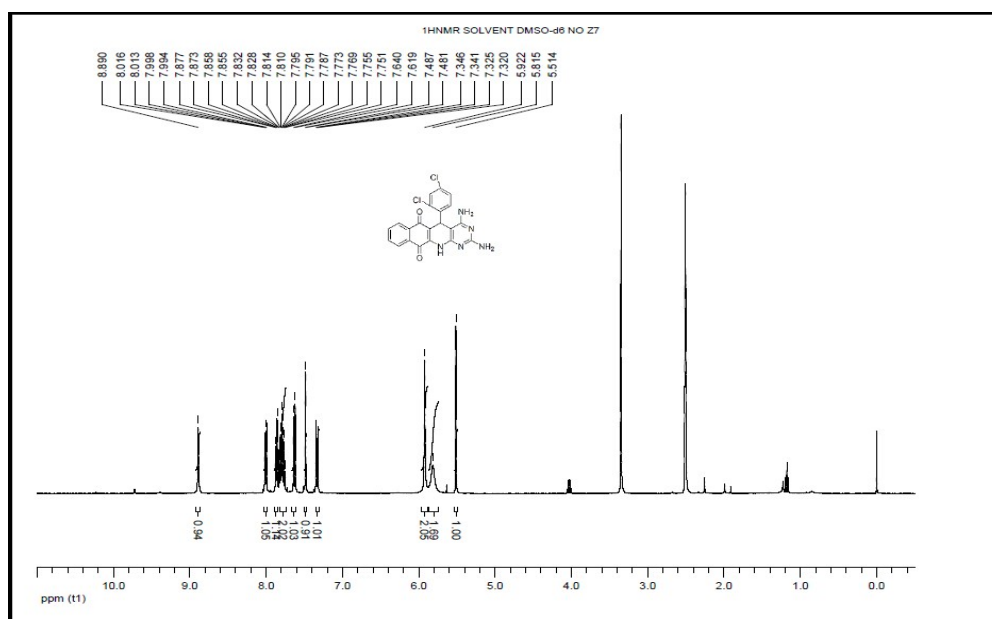

Figure 22 <sup>1</sup>H NMR of 4f

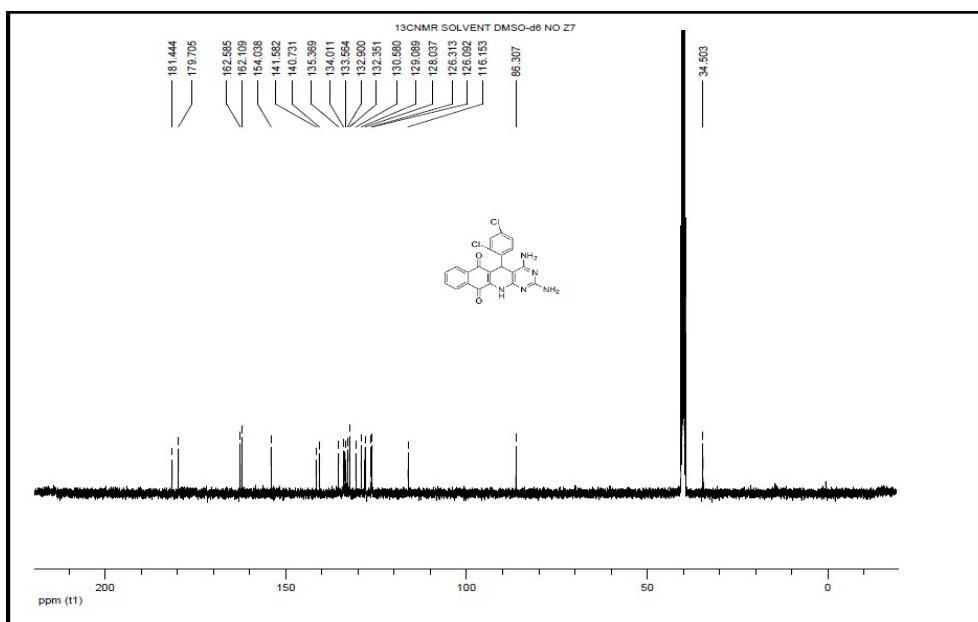

Figure 23  $^{13}\text{C}$  NMR of 4f

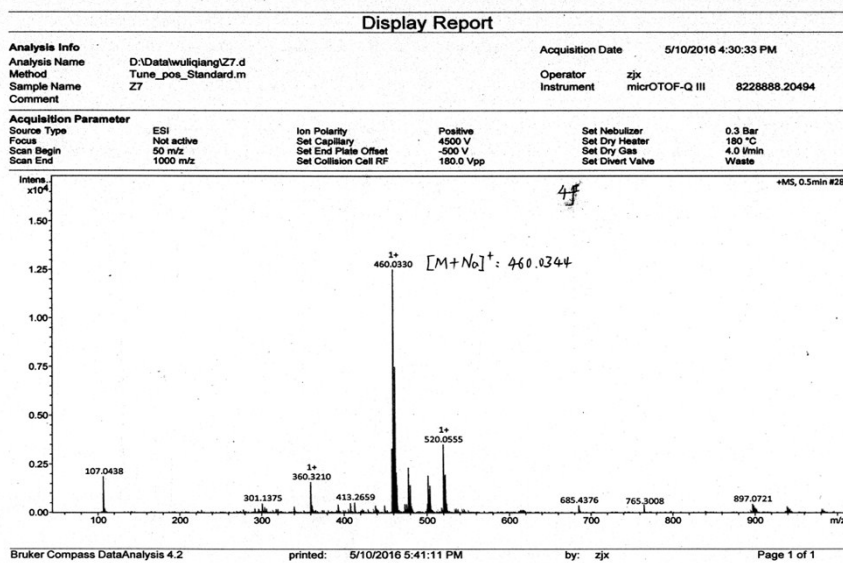

Figure 24 HRMS of 4f

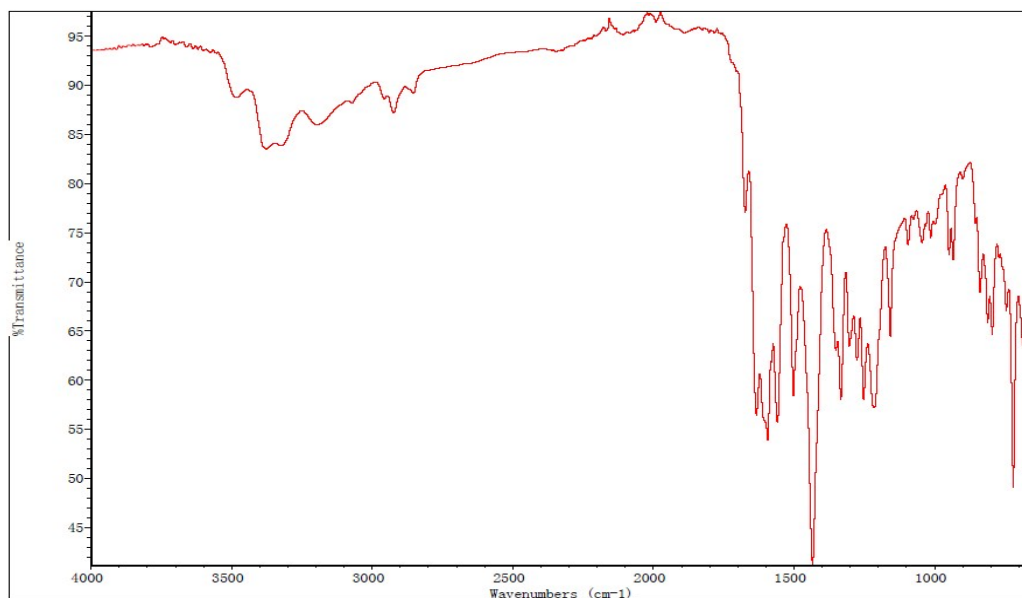

Figure 25 IR of 4g

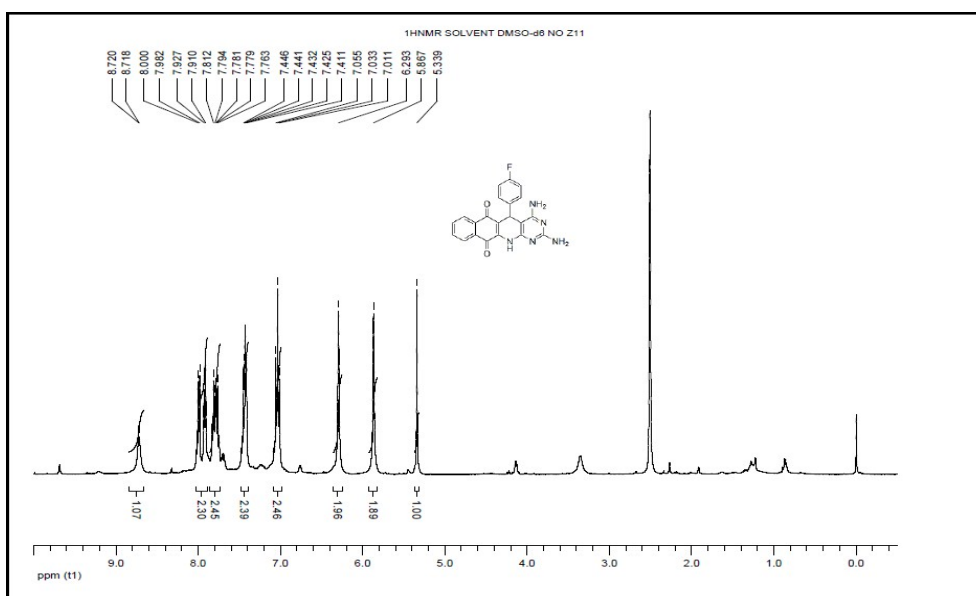

Figure 26 <sup>1</sup>H NMR of 4g

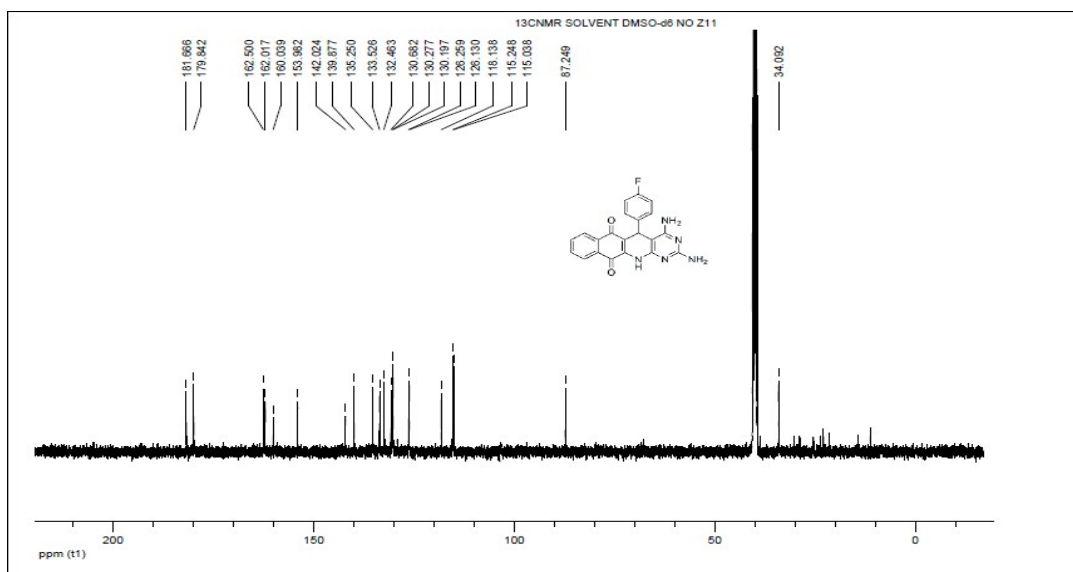

Figure 27  $^{13}\text{C}$  NMR of 4g

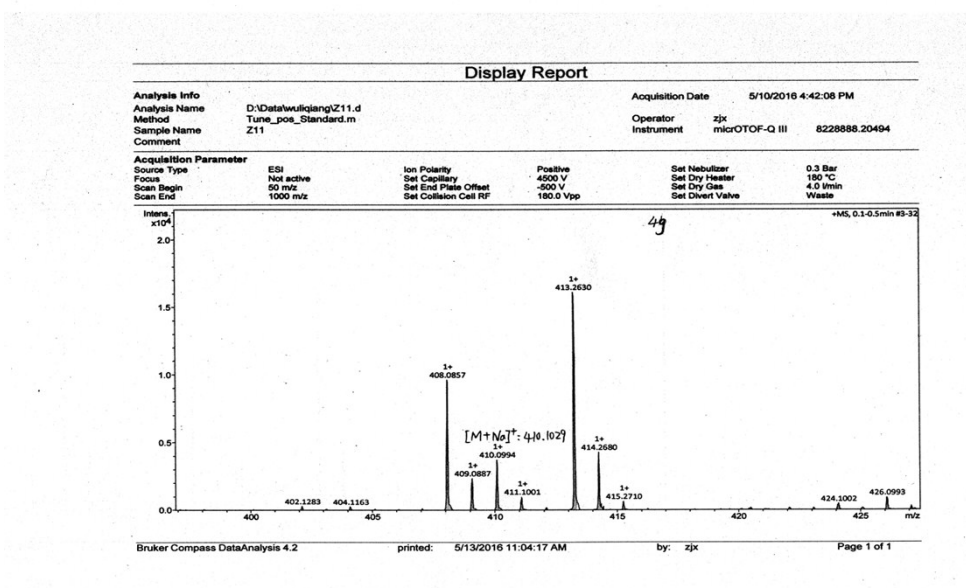

Figure 28 HRMS of 4g

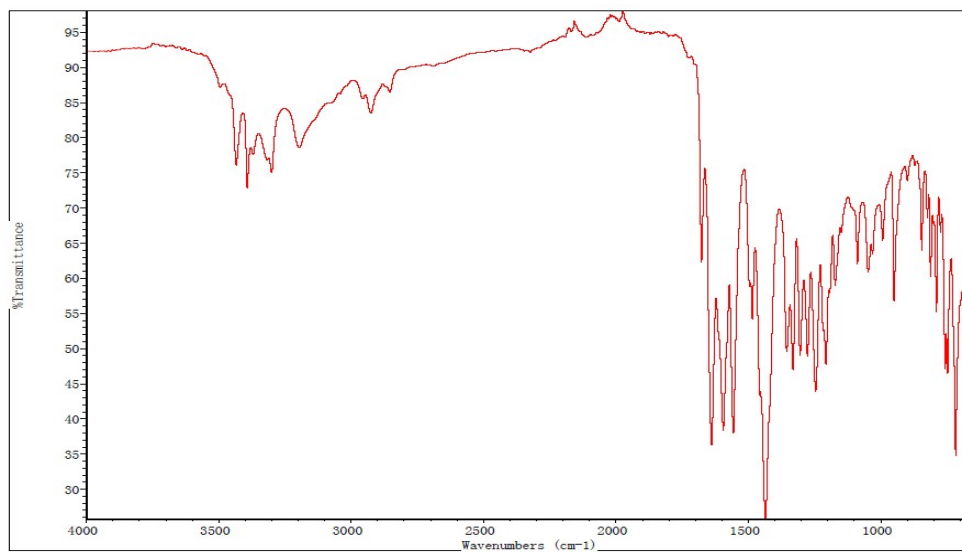

Figure 29 IR of 4h

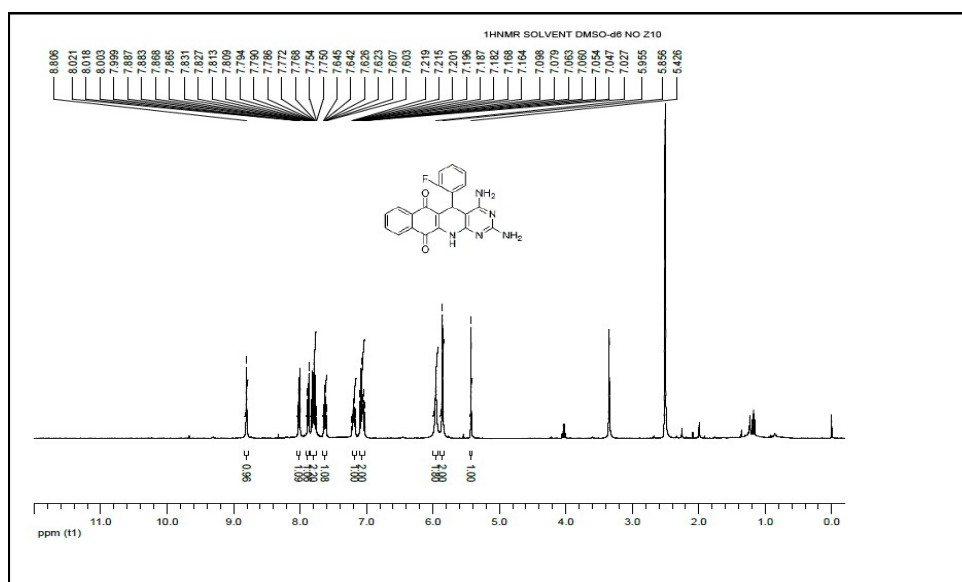

Figure 30 <sup>1</sup>H NMR of 4h



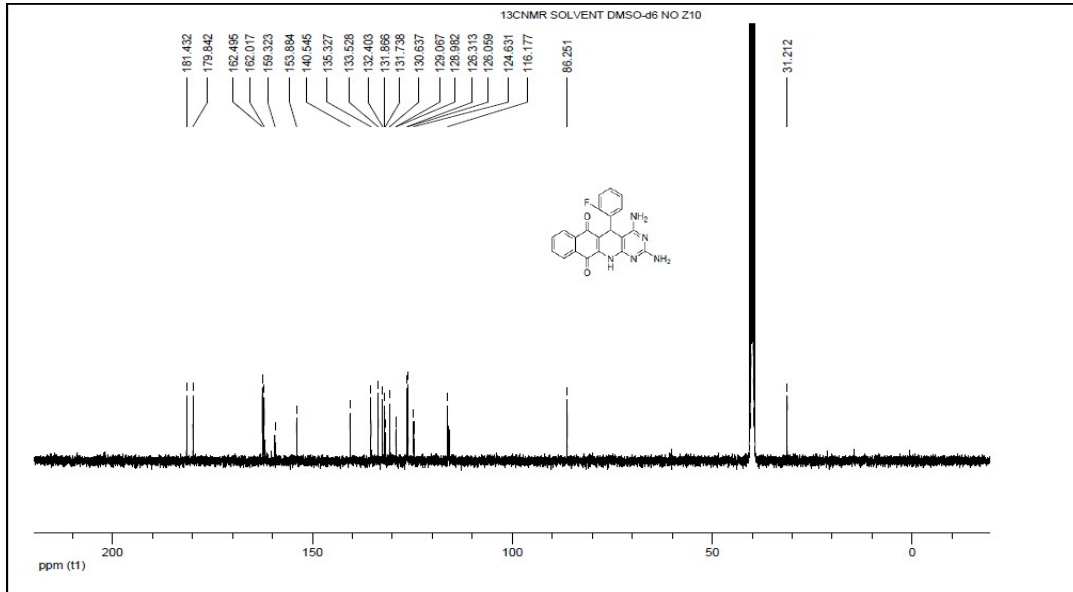

Figure 31  $^{13}\text{C}$  NMR of 4h

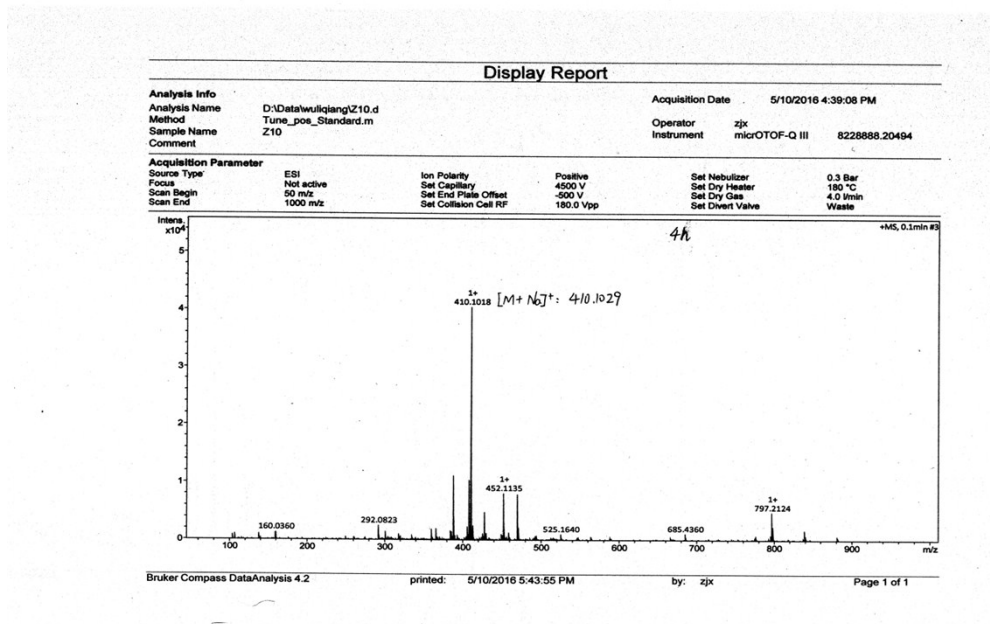

Figure 32 HRMS of 4h

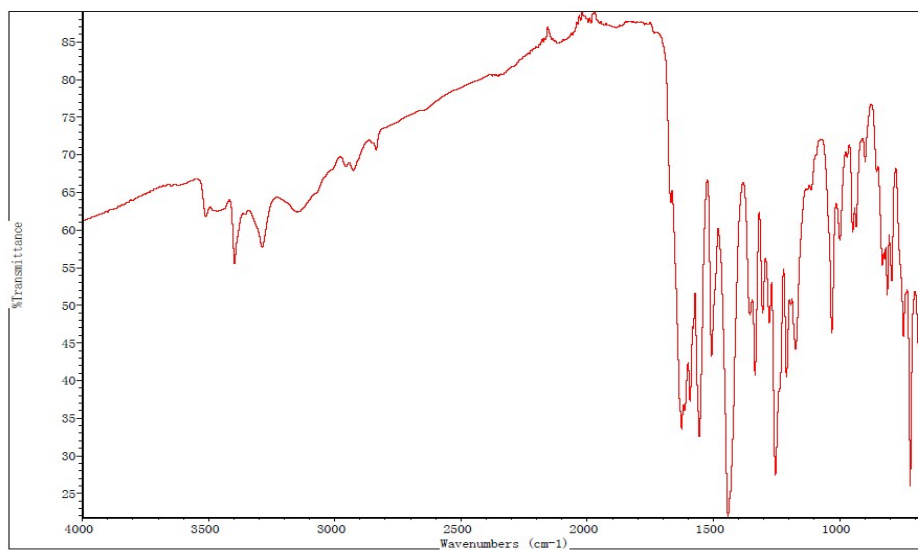

Figure 33 IR of 4i

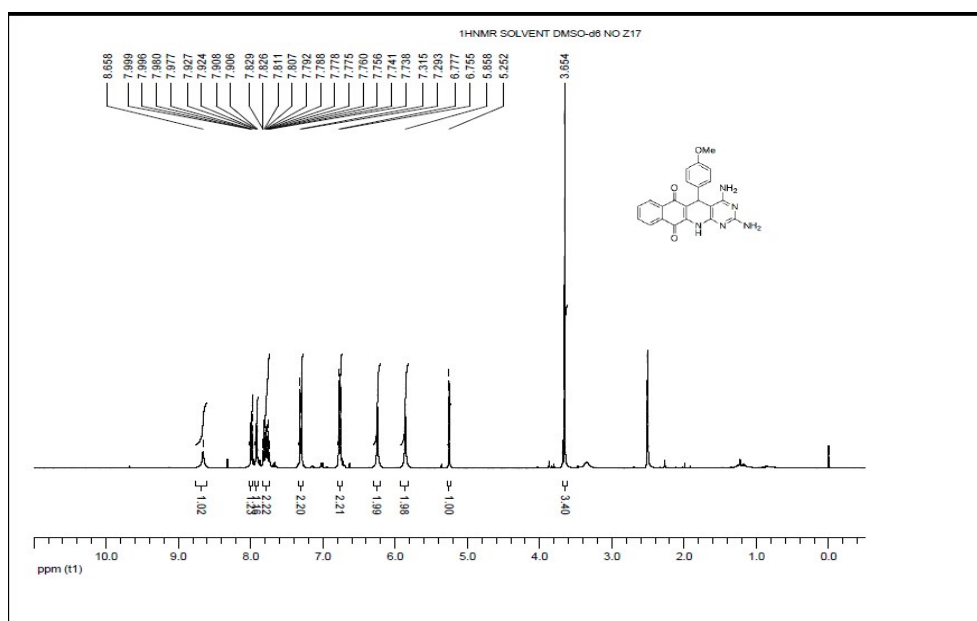

Figure 34 <sup>1</sup>H NMR of 4i

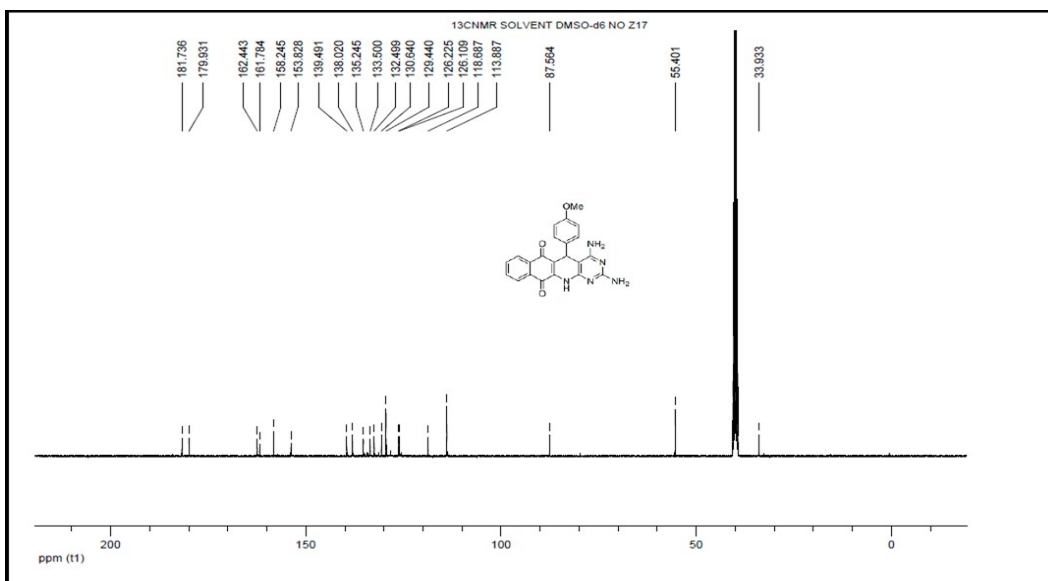

Figure 35  $^{13}\text{C}$  NMR of 4i

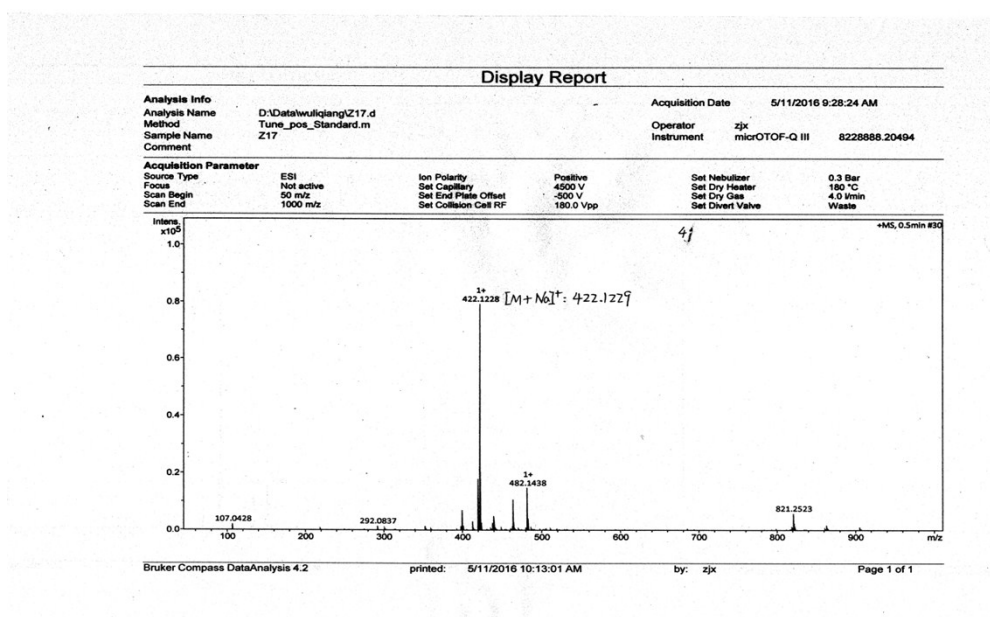

Figure 36 HRMS of 4i

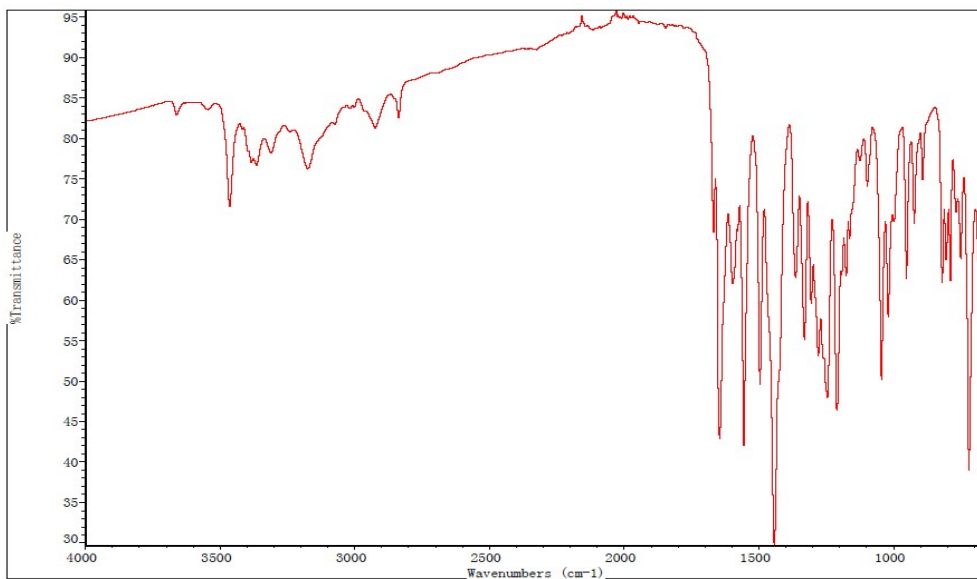

Figure 37 IR of 4j

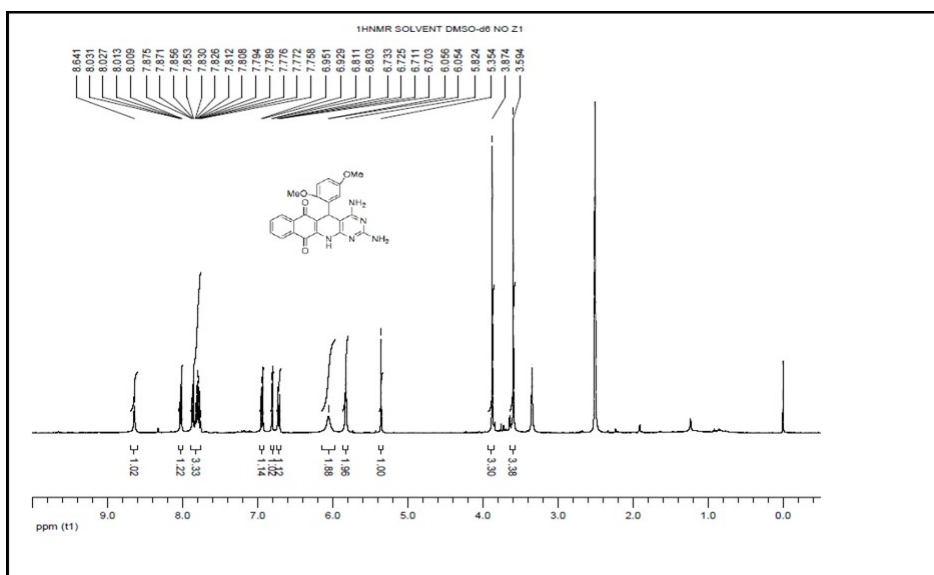

Figure 38 <sup>1</sup>H NMR of 4j

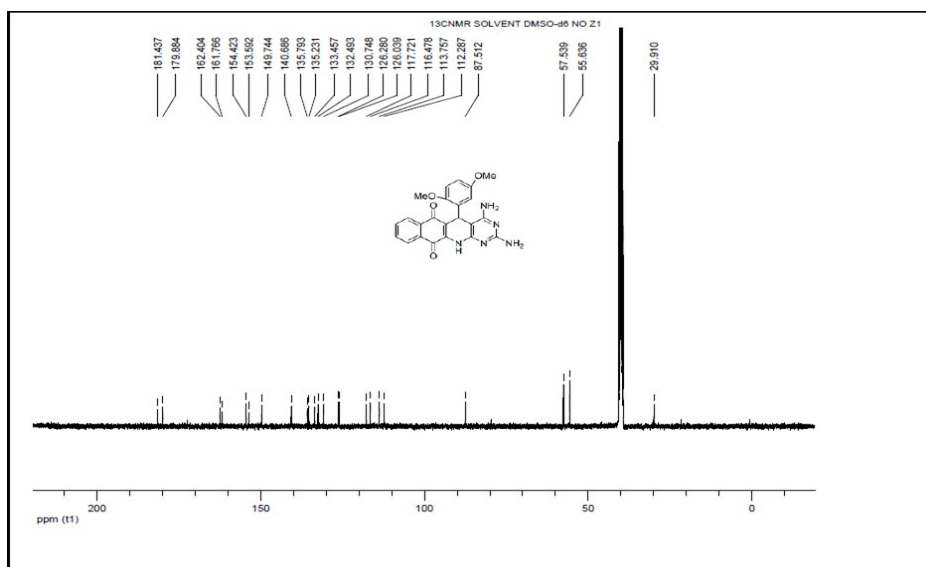

Figure 39 <sup>13</sup>C NMR of 4j

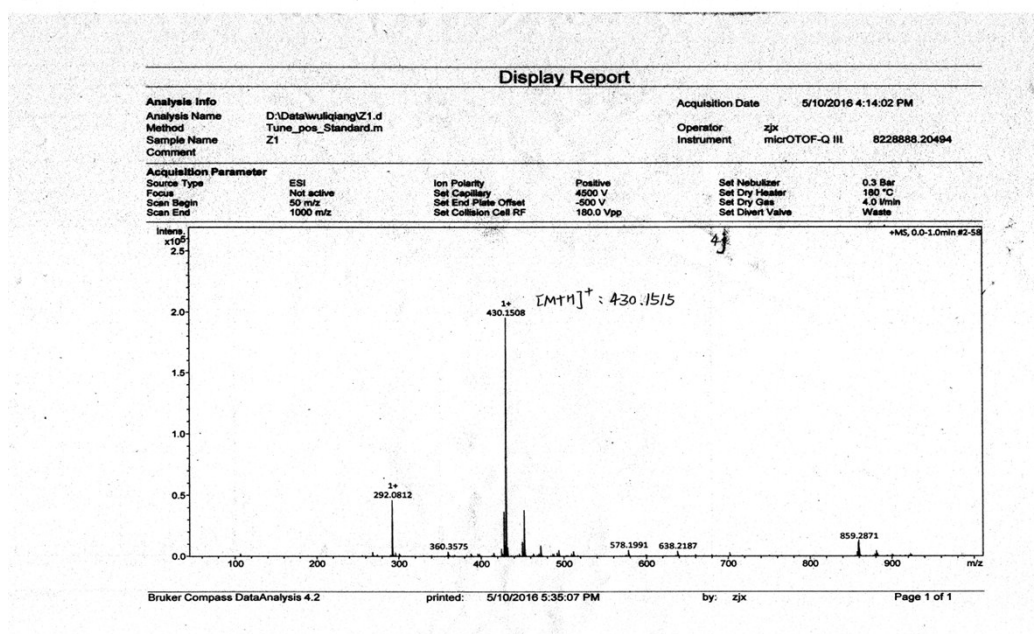

Figure 40 HRMS of 4j

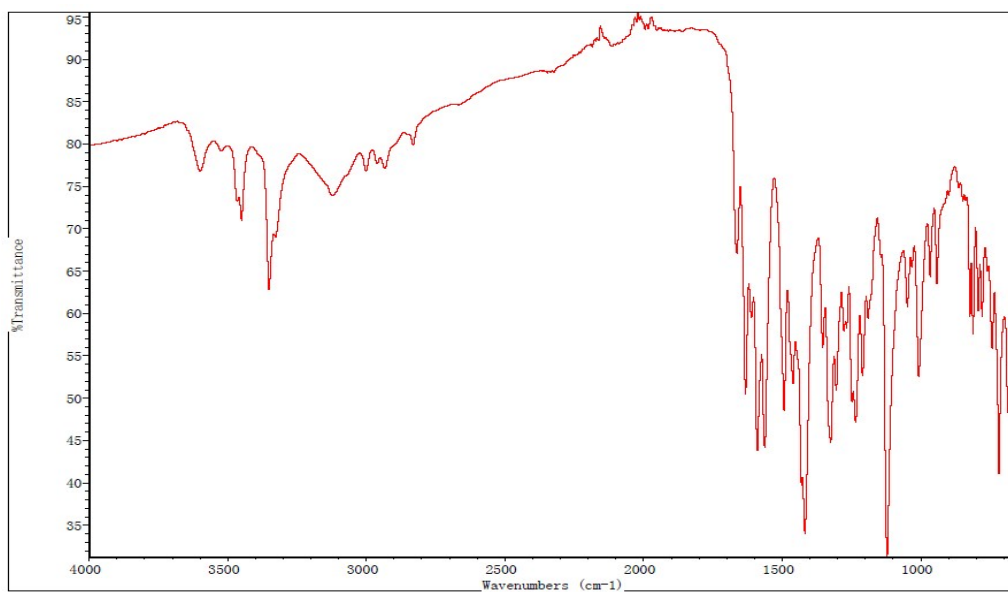

Figure 41 IR of 4k

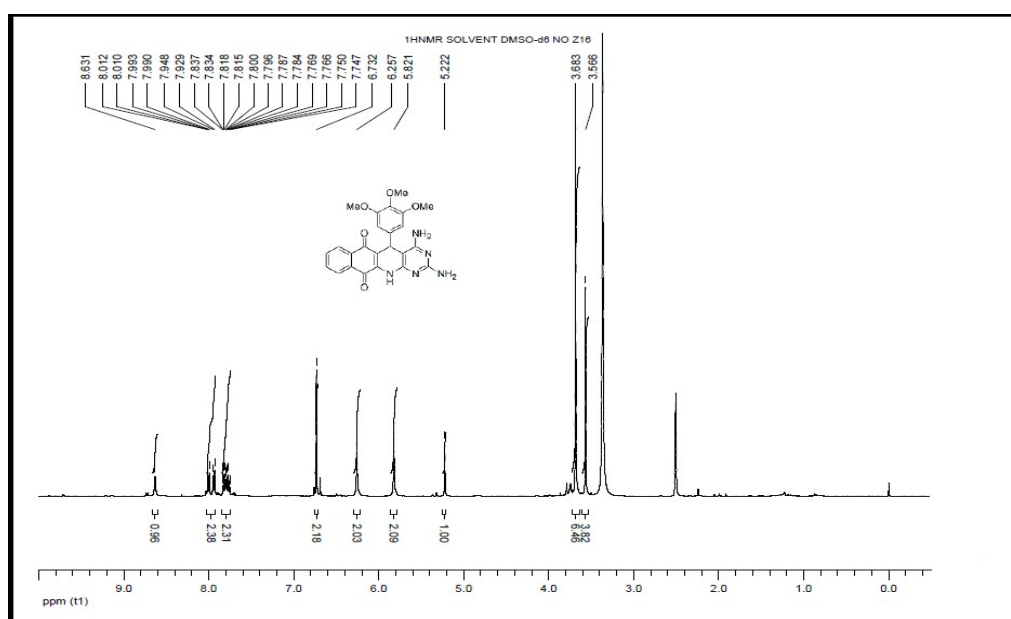

Figure 42 <sup>1</sup>H NMR of 4k

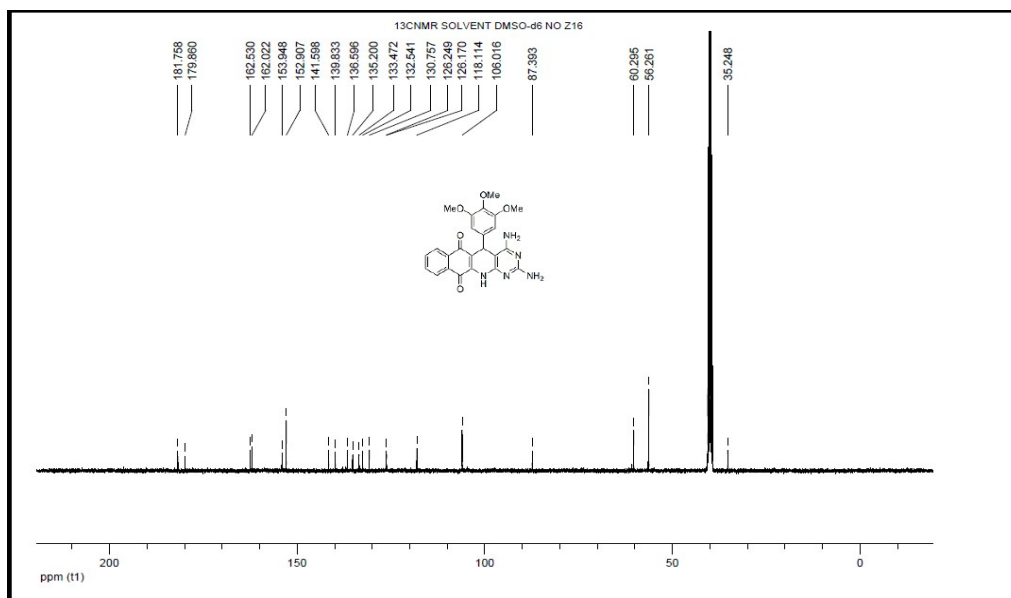

Figure 43  $^{13}\text{C}$  NMR of 4k

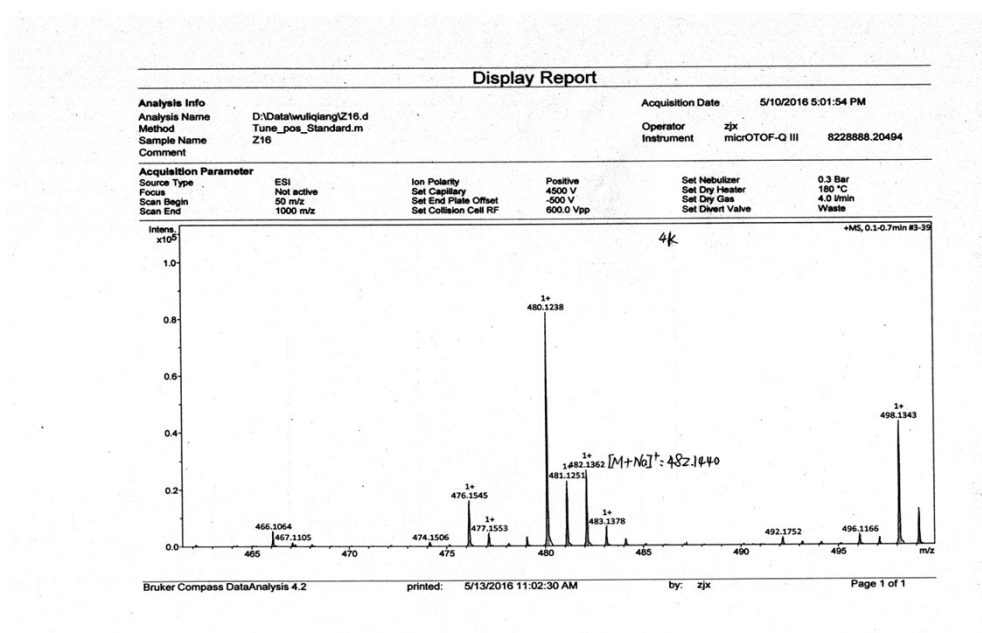

Figure 44 HRMS of 4k

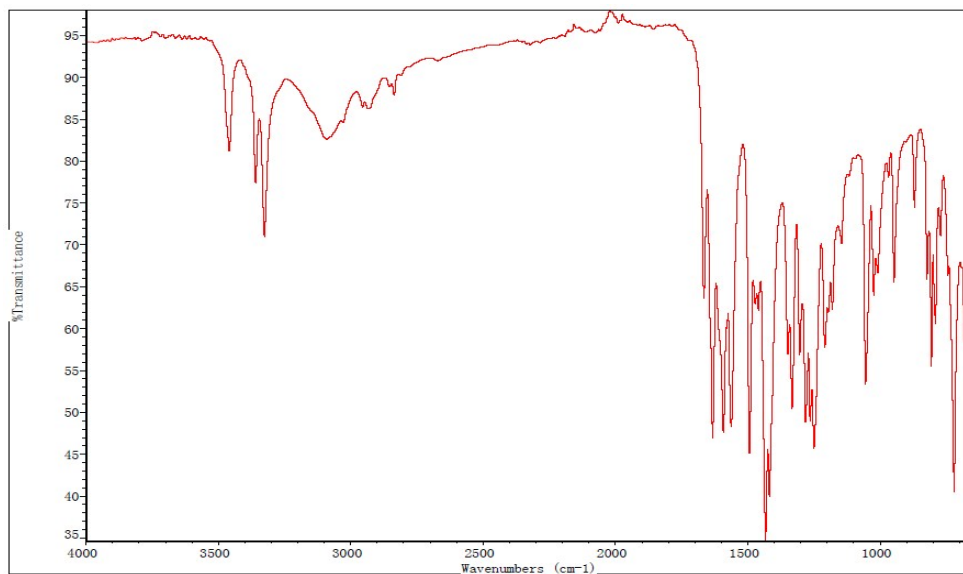

Figure 45 IR of 41

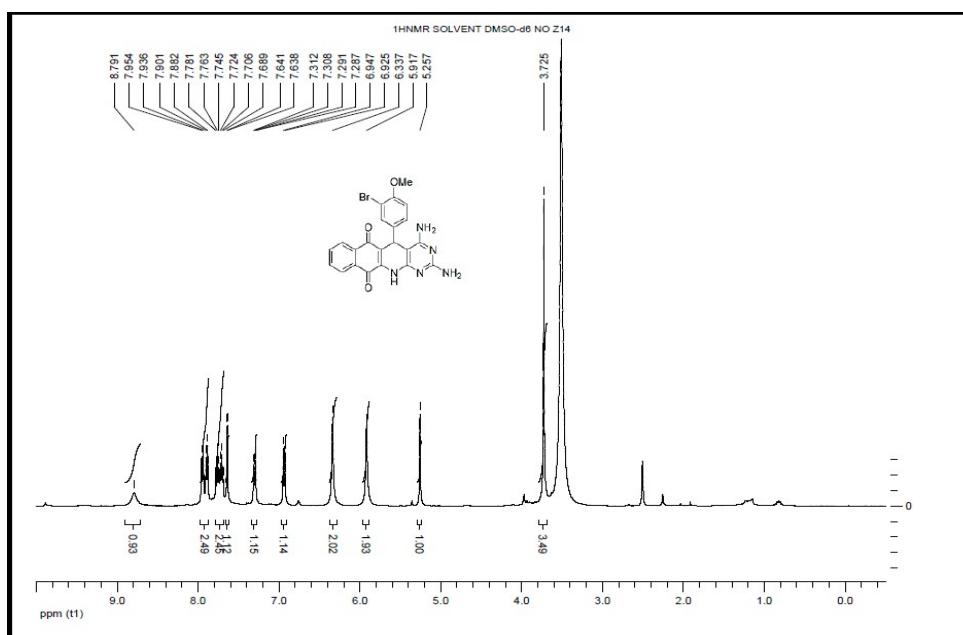

Figure 46 <sup>1</sup>H NMR of 41



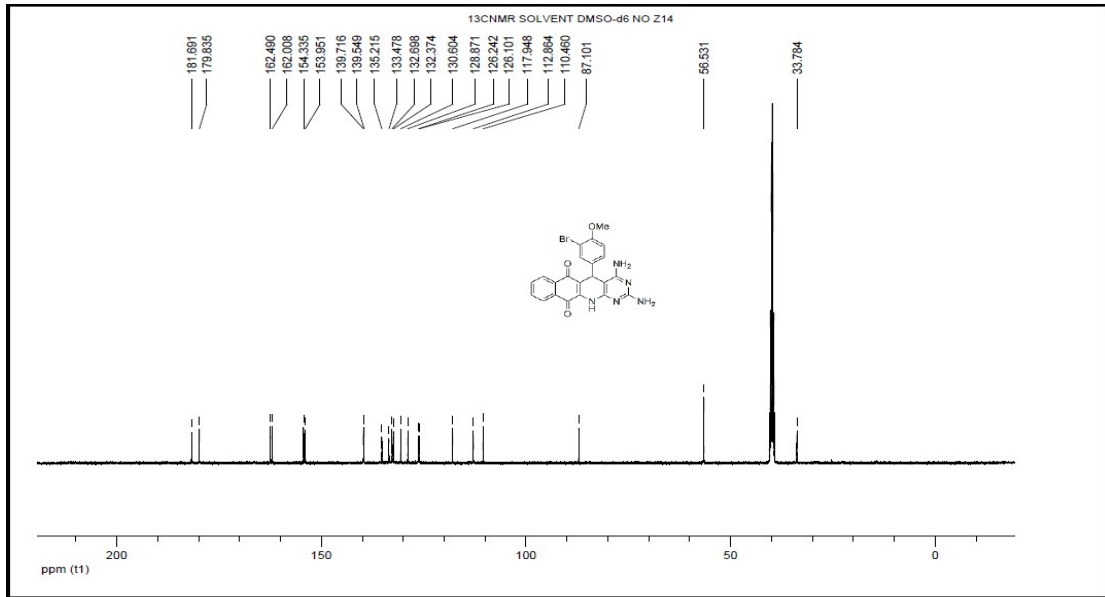

Figure 47 <sup>13</sup>C NMR of 41

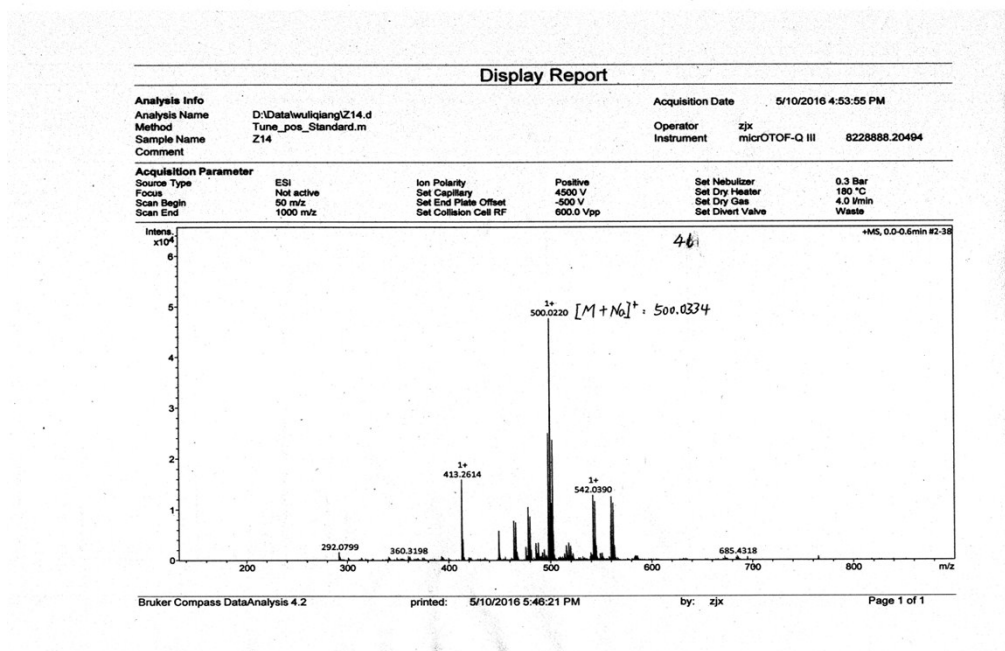

Figure 48 HRMS of 41

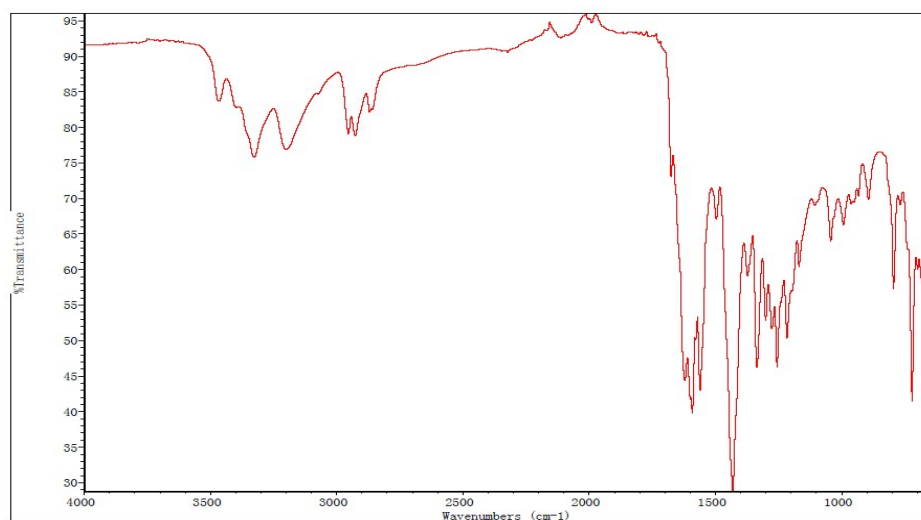

Figure 49 IR of 4m

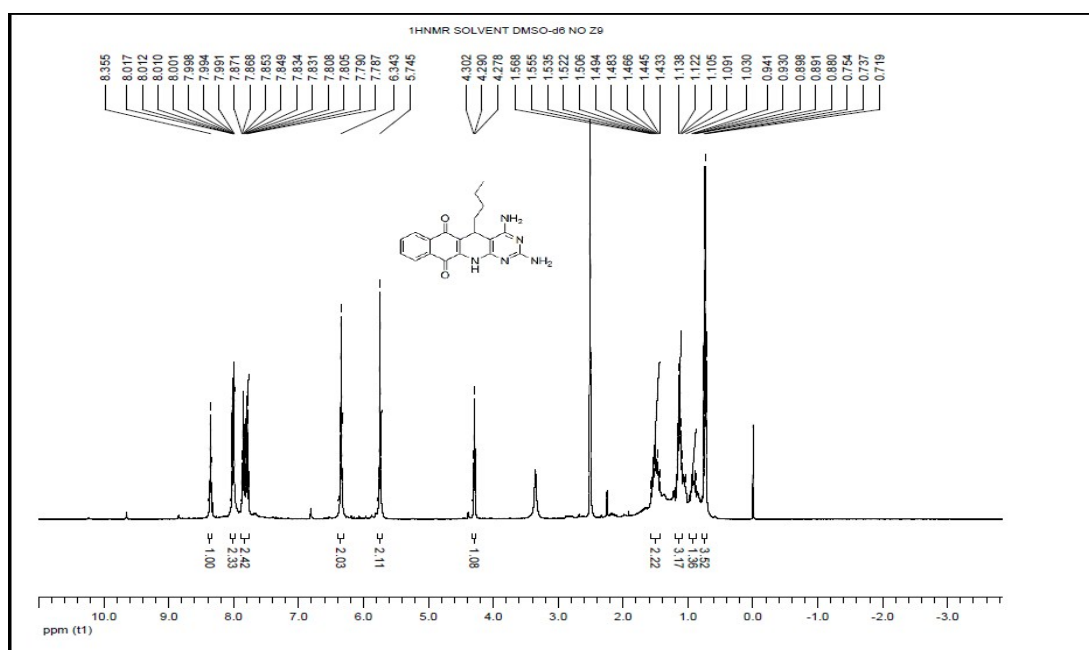

Figure 50 <sup>1</sup>H NMR of 4m

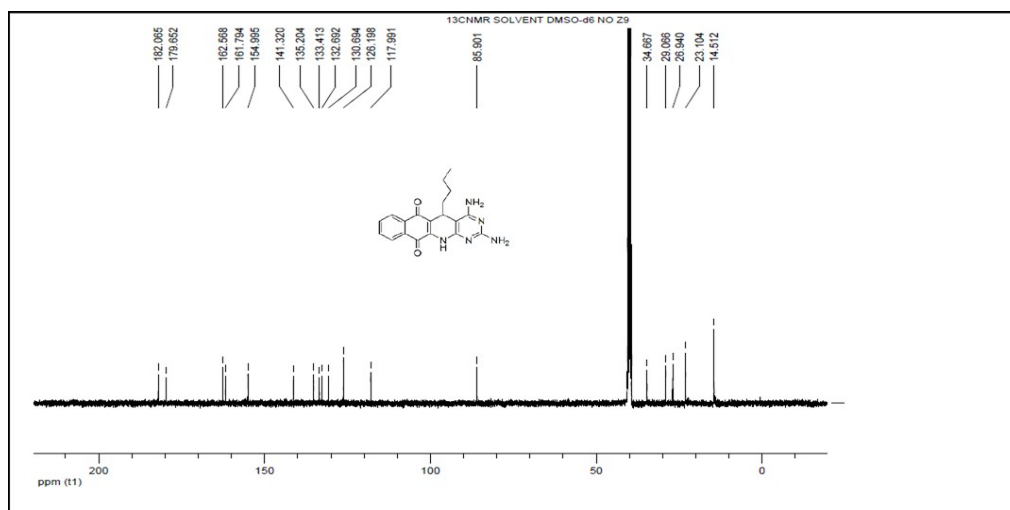

Figure 51  $^{13}\text{C}$  NMR of 4m

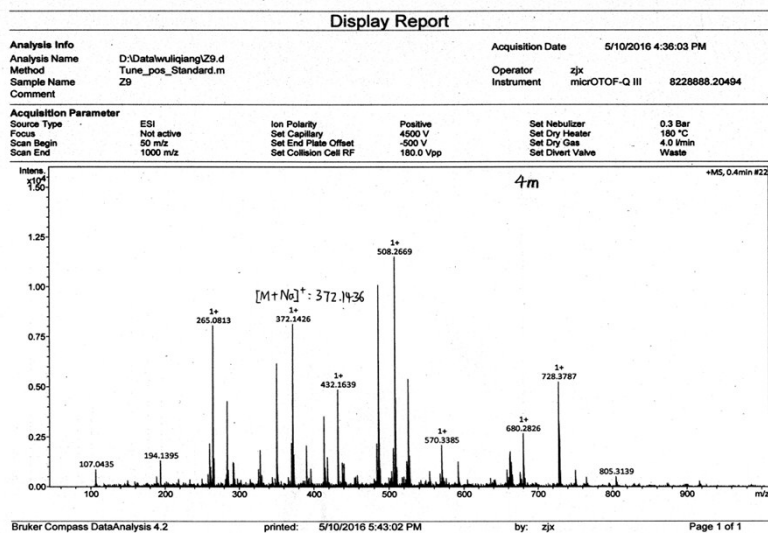

Figure 52 HRMS of 4m

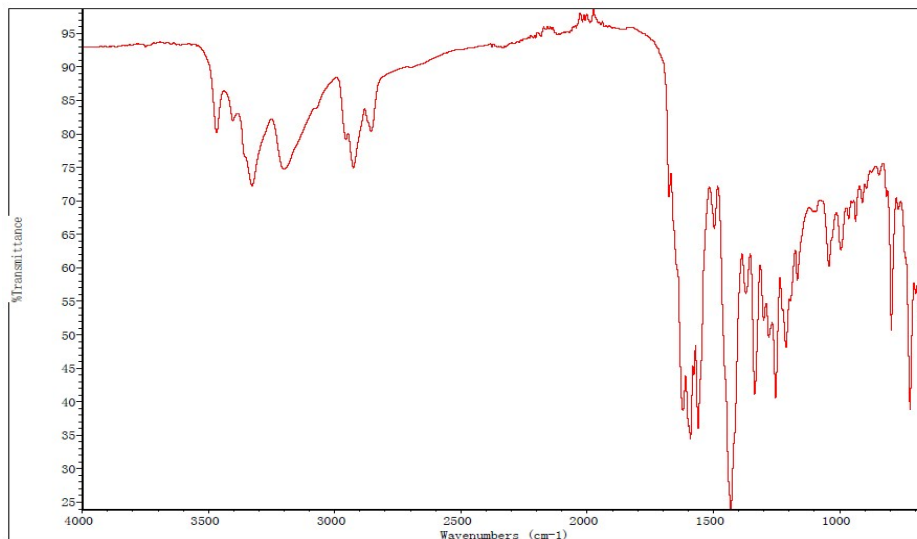

Figure 53 IR of 4n

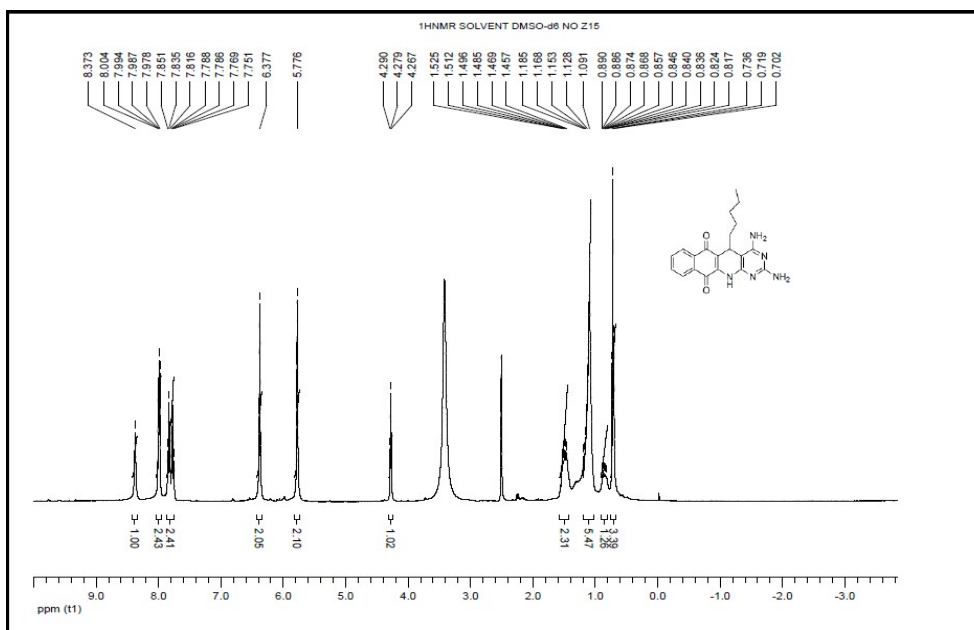

Figure 54 <sup>1</sup>H NMR of 4n

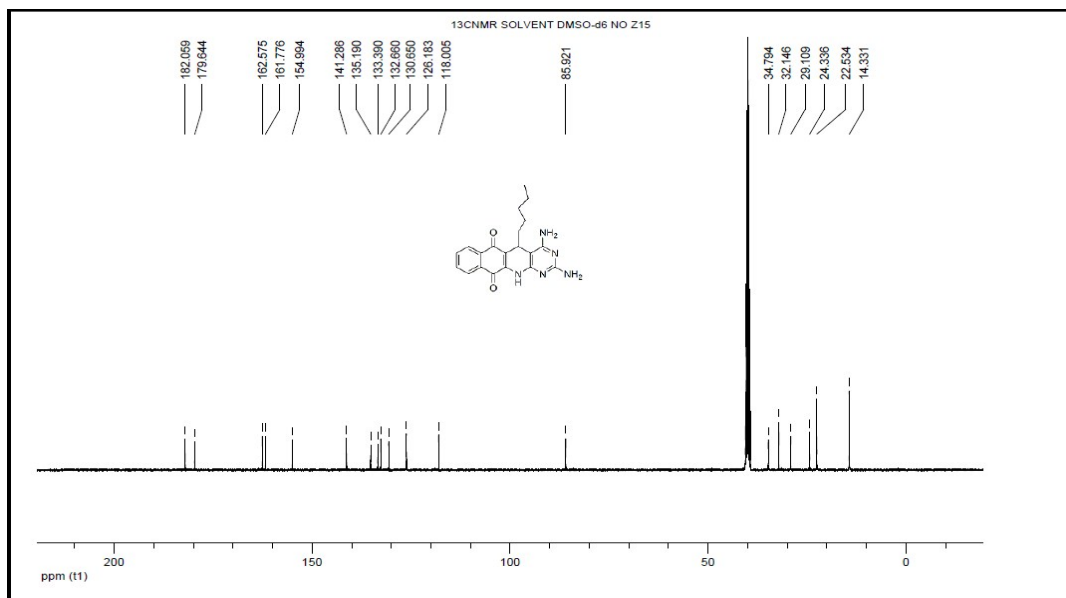

Figure 55  $^{13}\text{C}$  NMR of 4n

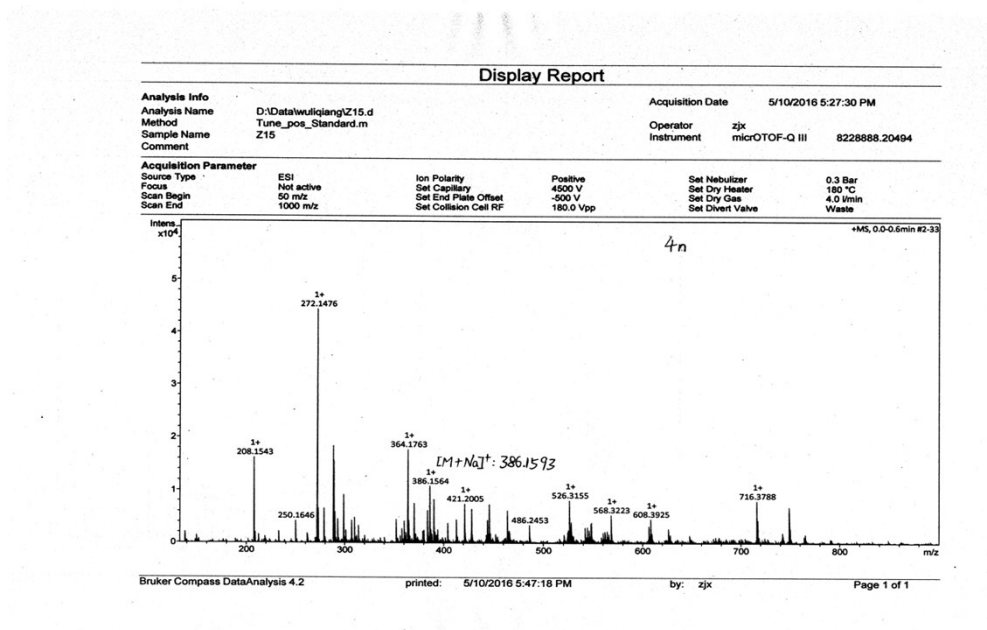

Figure 56 HRMS of 4n

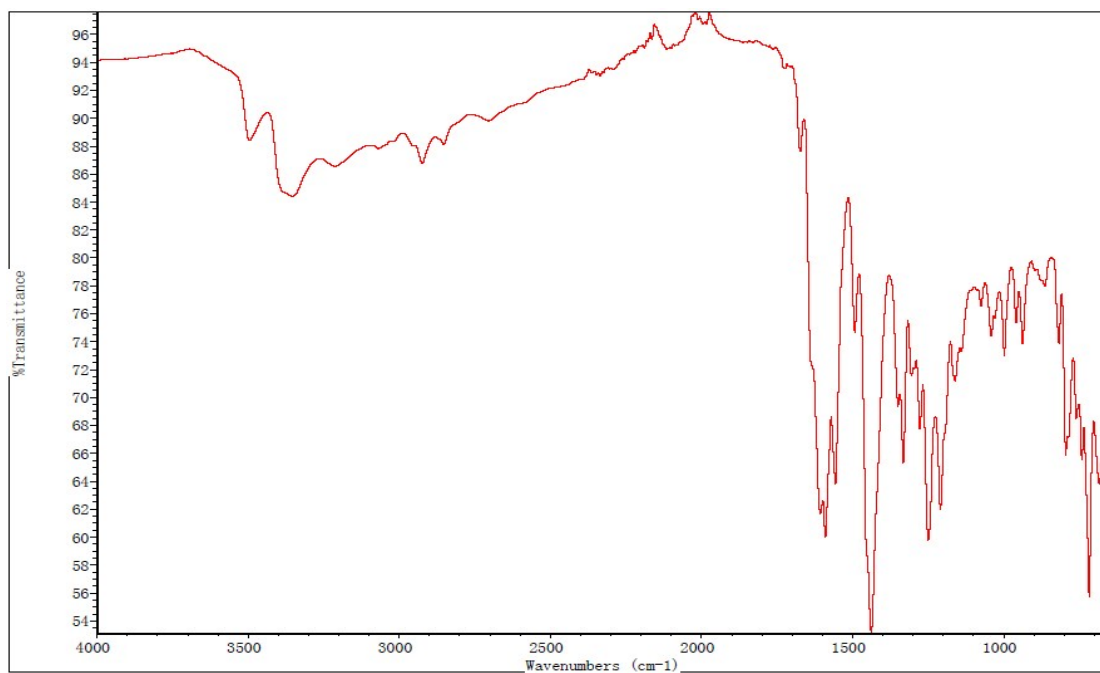

Figure 57 IR of 4o

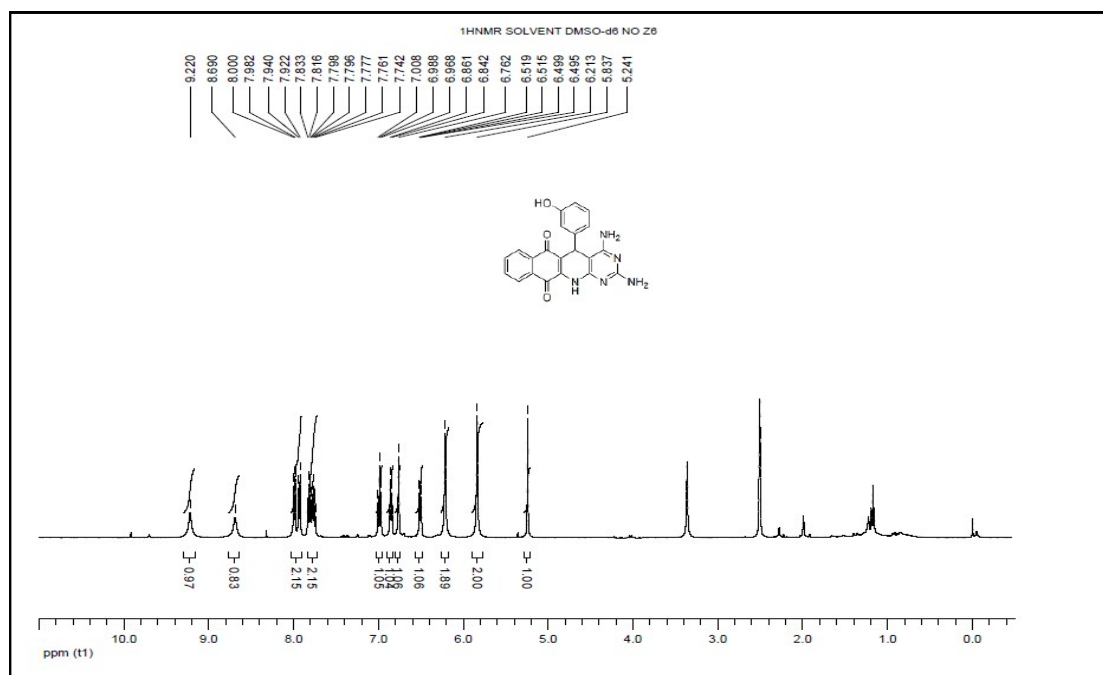

Figure 58 <sup>1</sup>H NMR of 4o

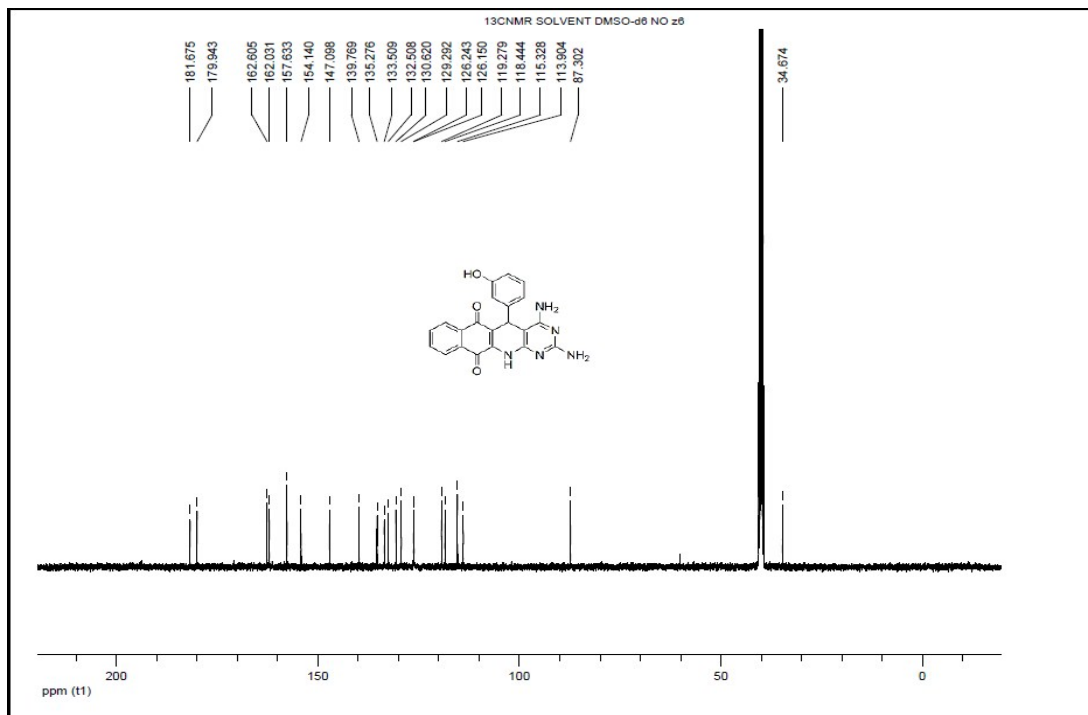

Figure 59  $^{13}\text{C}$  NMR of 4o

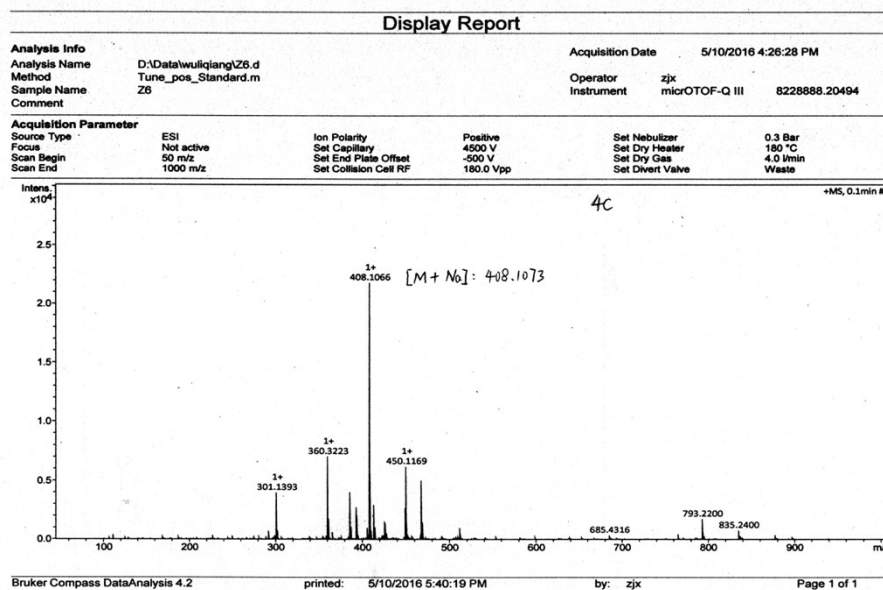

Figure 60 HRMS of 4o

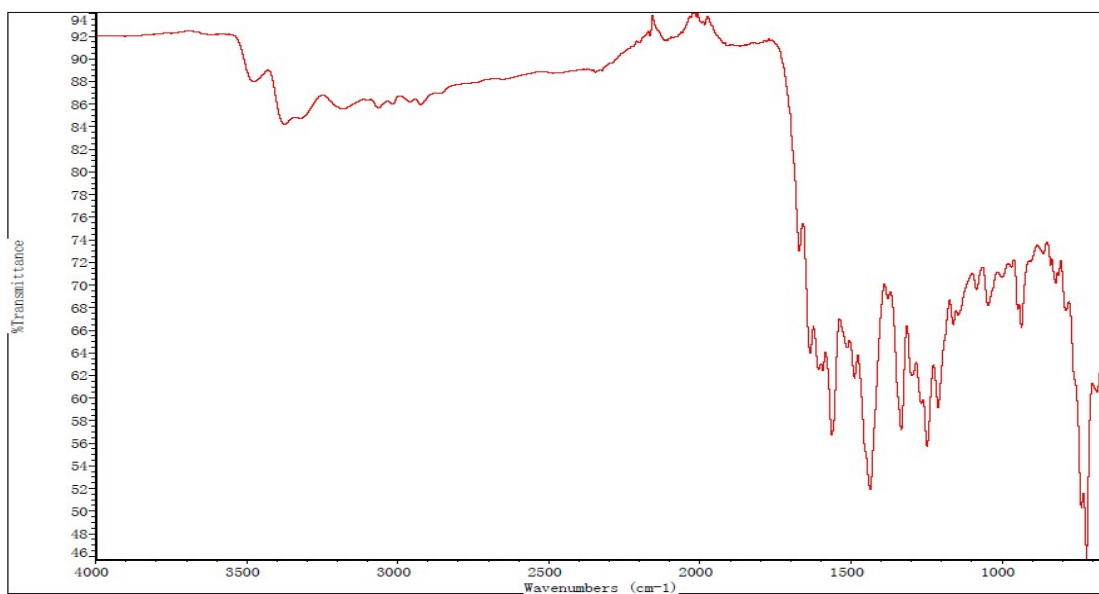

Figure 61 IR of 4p

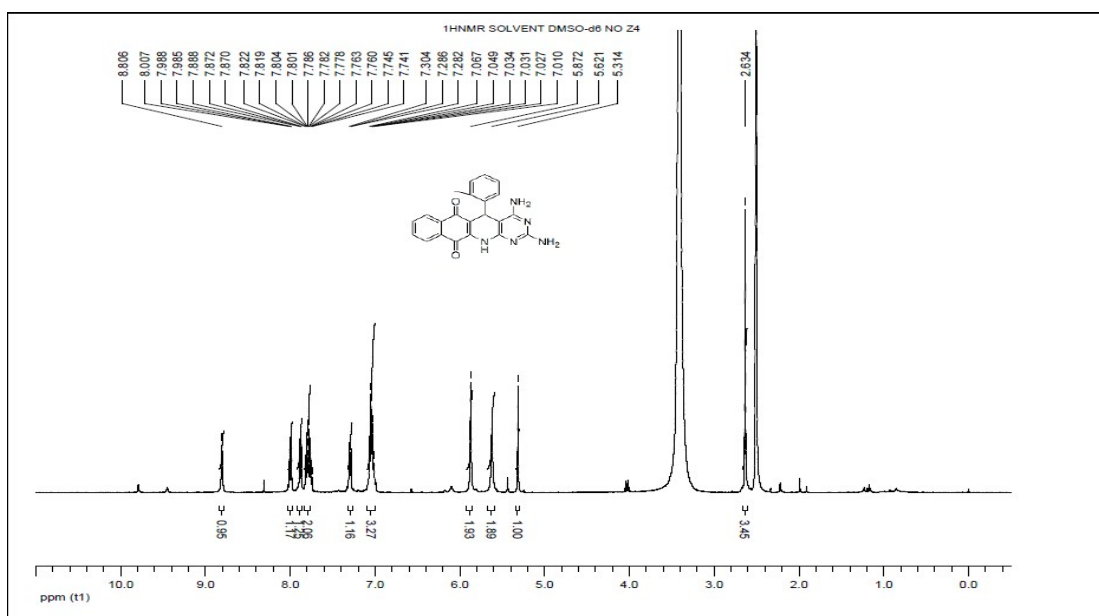

Figure 62 <sup>1</sup>H NMR of 4p



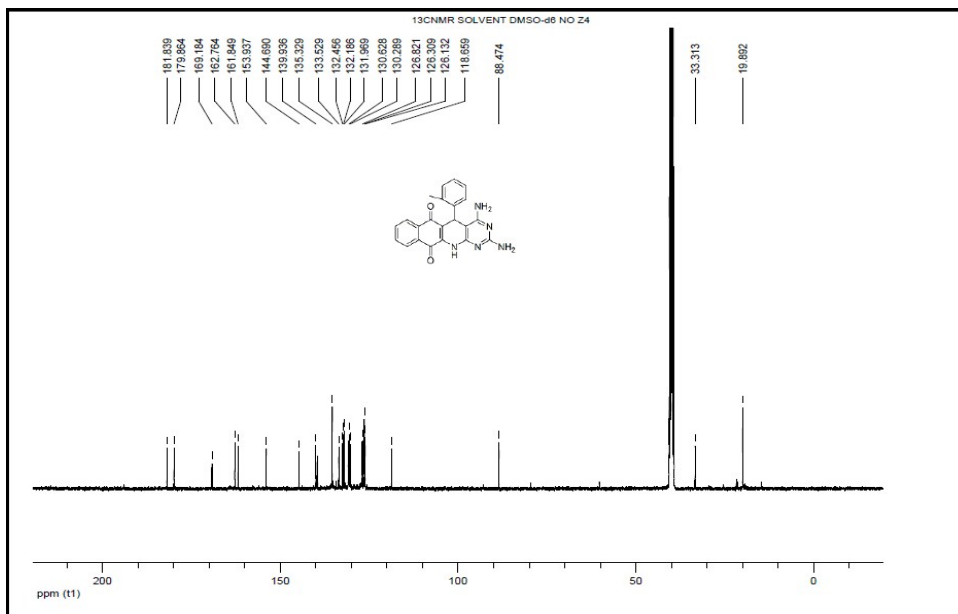

Figure 63 <sup>13</sup>C NMR of 4p

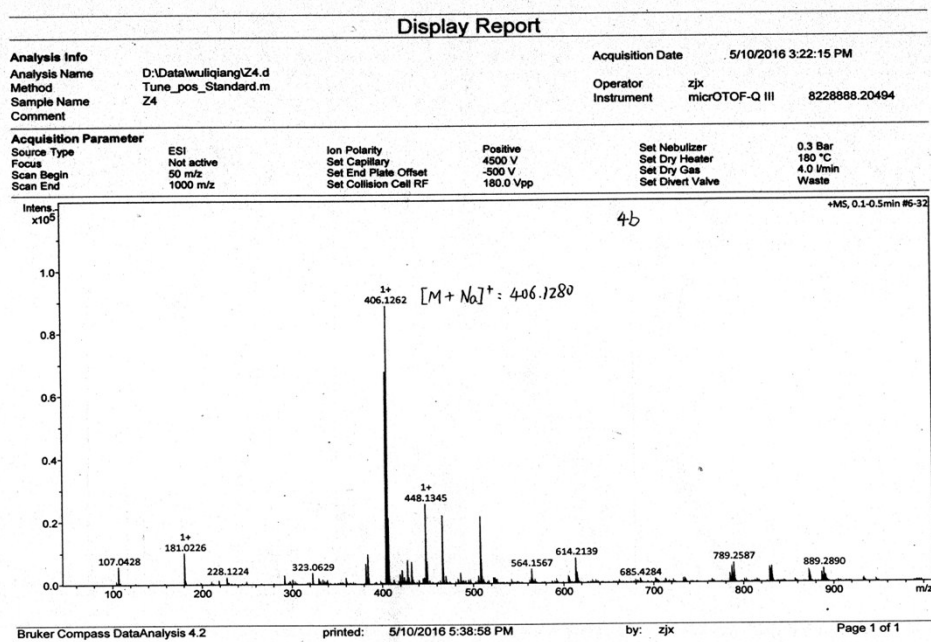

Figure 64 HRMS of 4p

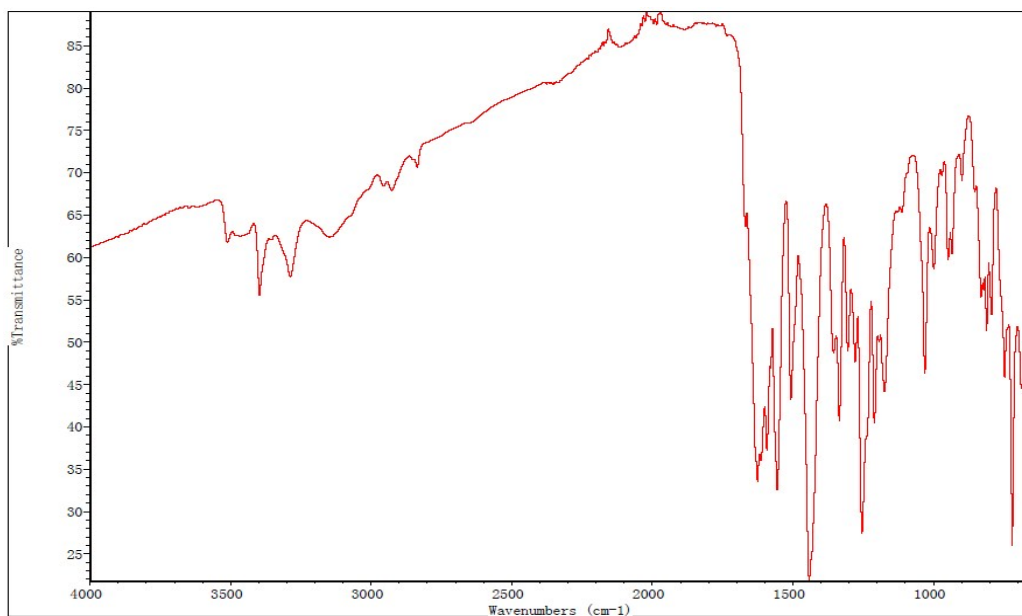

Figure 65 IR of 4q

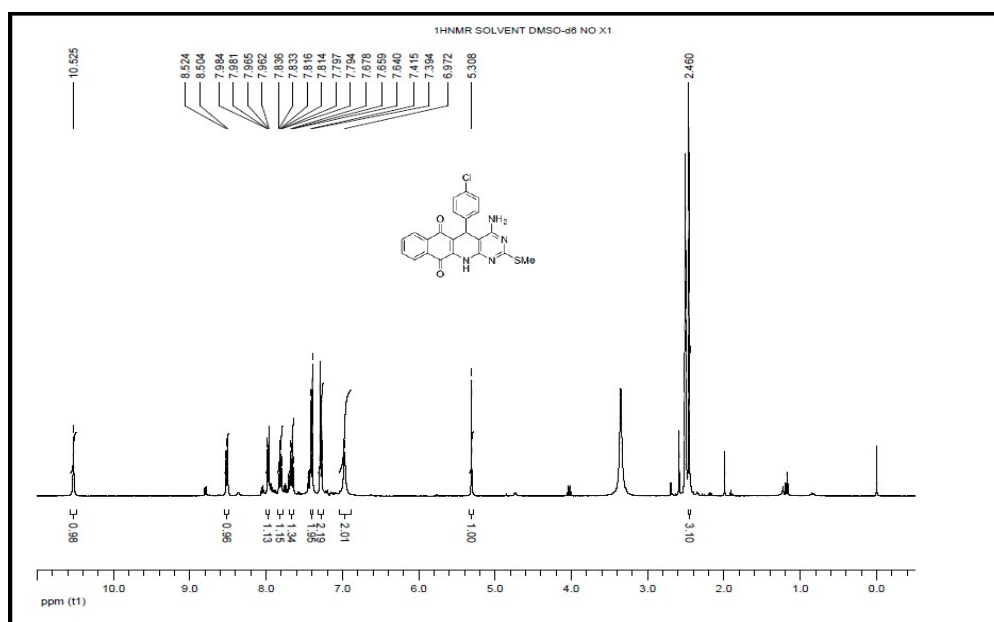

Figure 66 <sup>1</sup>H NMR of 4q

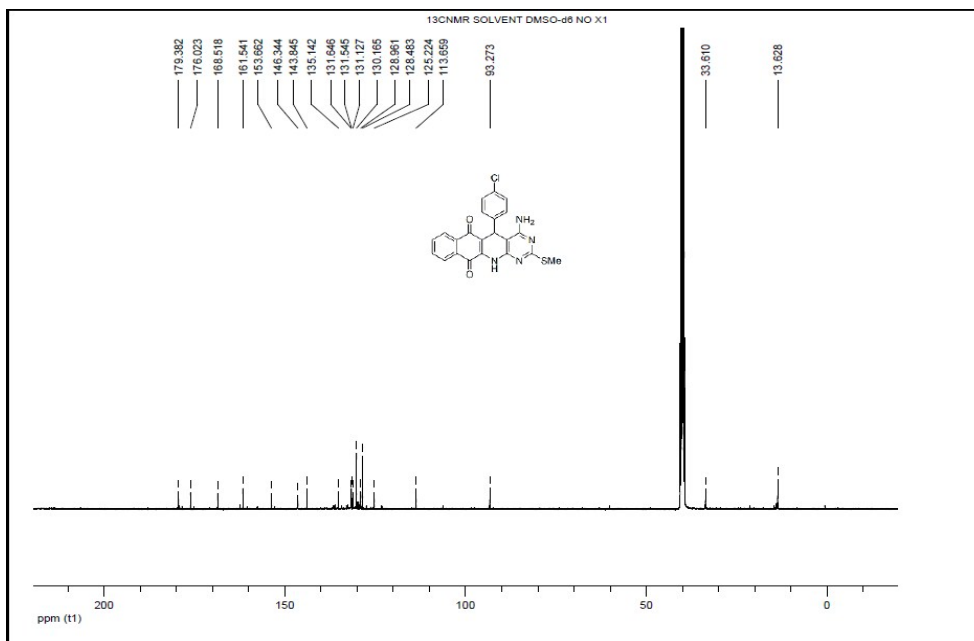

Figure 67  $^{13}\text{C}$  NMR of 4q

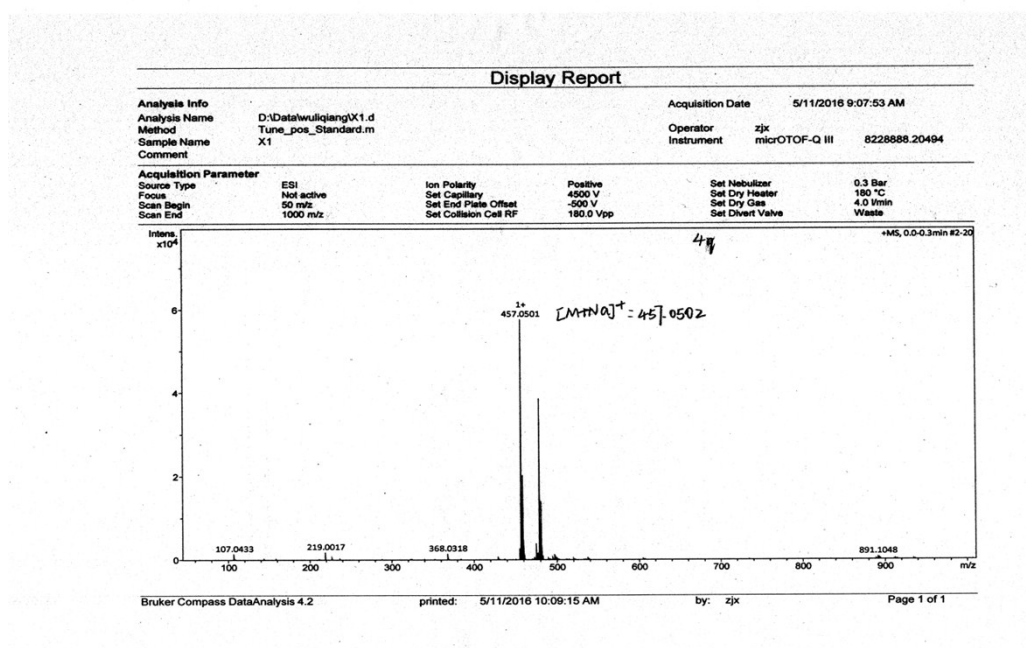

Figure 68 HRMS of 4q

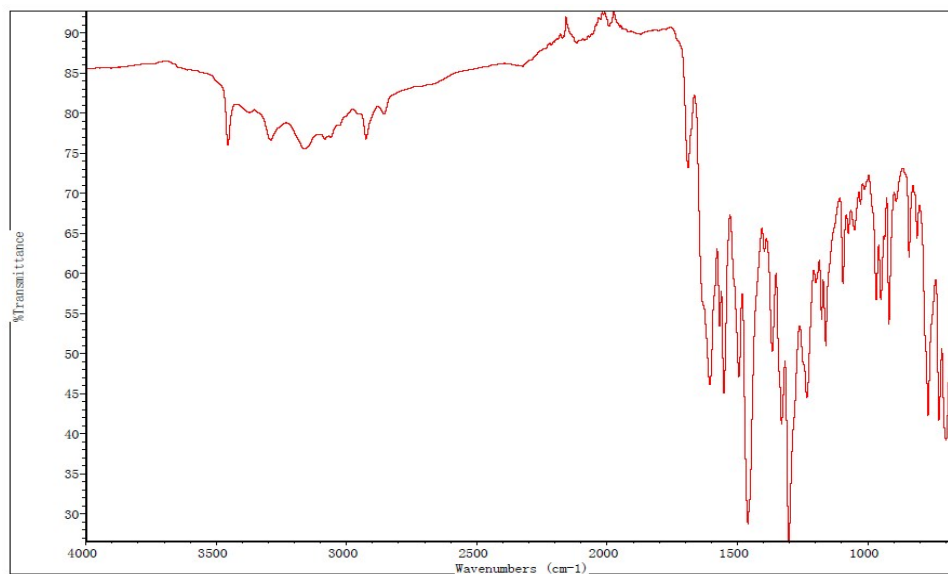

Figure 69 IR of 4r

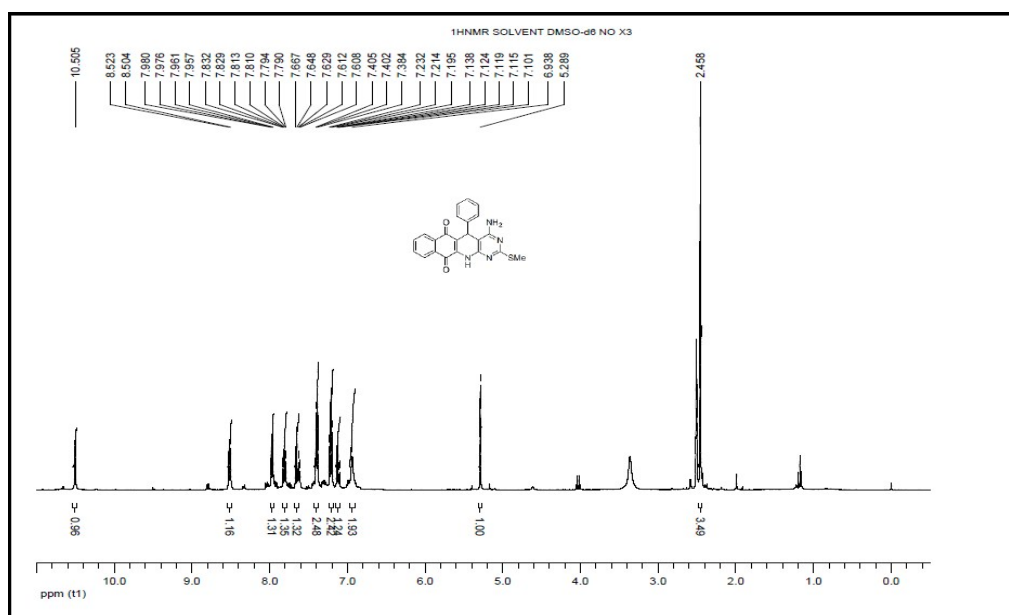

Figure 70 <sup>1</sup>H NMR of 4r

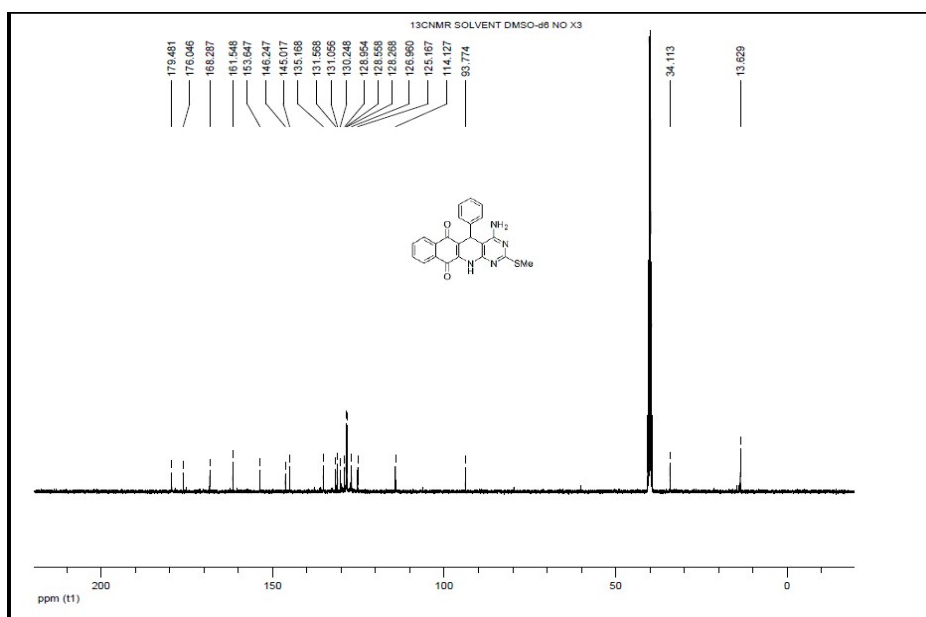

Figure 71  $^{13}\text{C}$  NMR of 4r

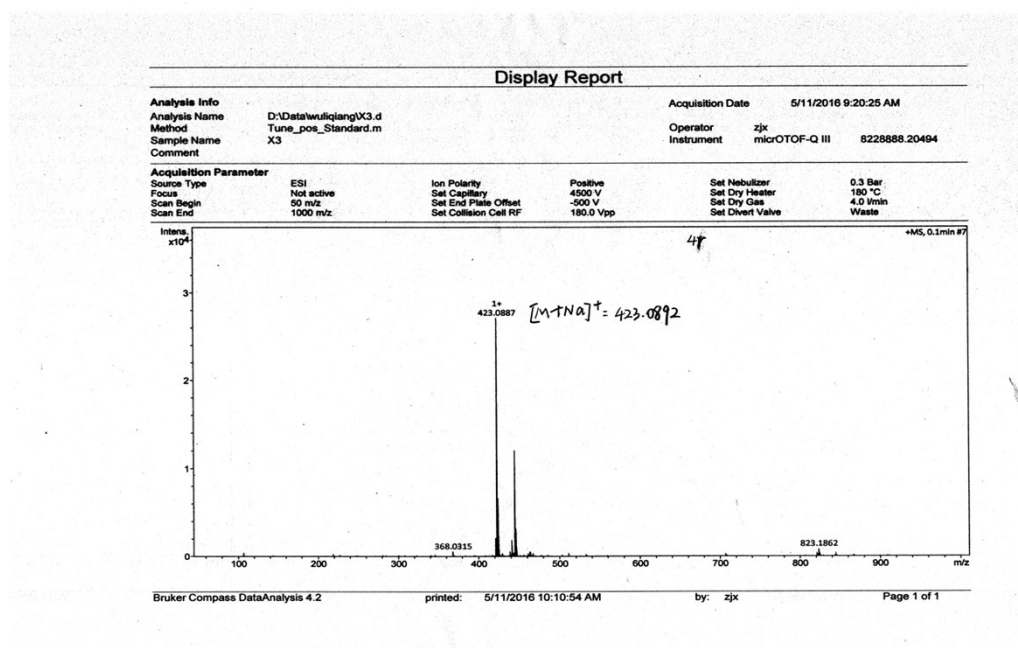

Figure 72 HRMS of 4r

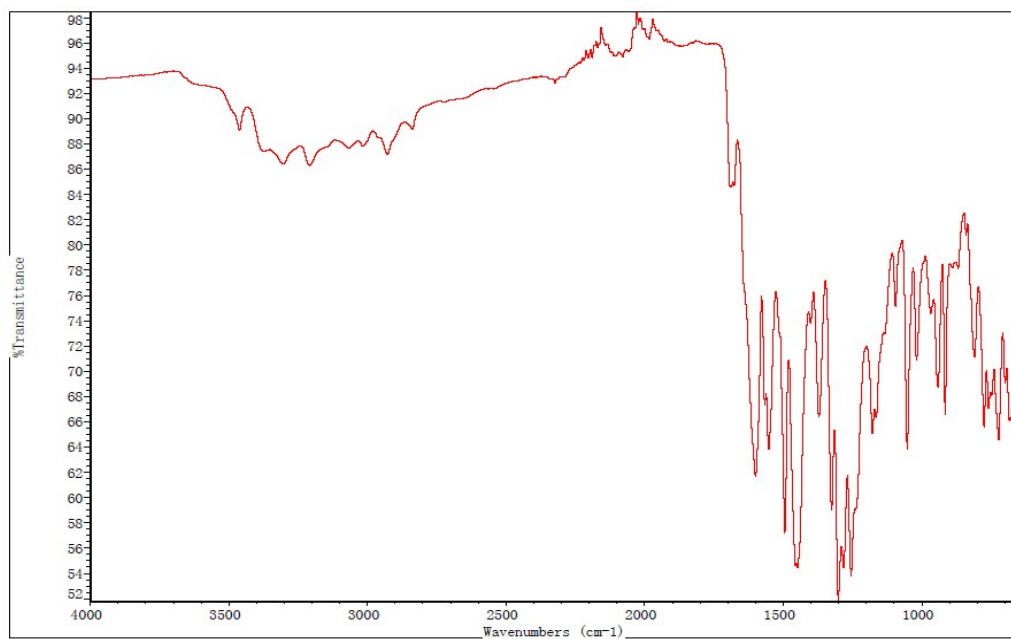

Figure 73 IR of 4s

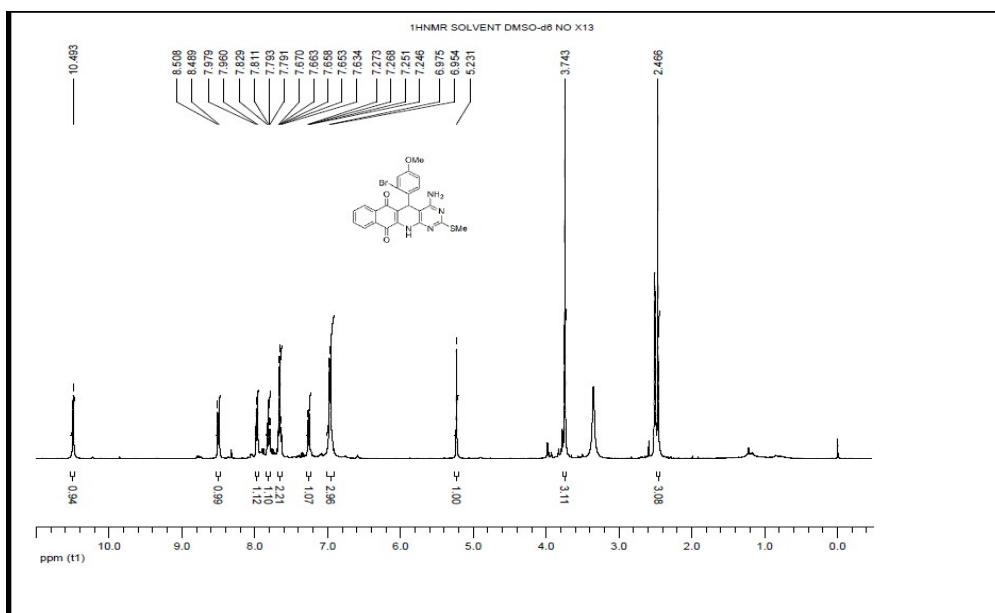

Figure 74 <sup>1</sup>H NMR of 4s

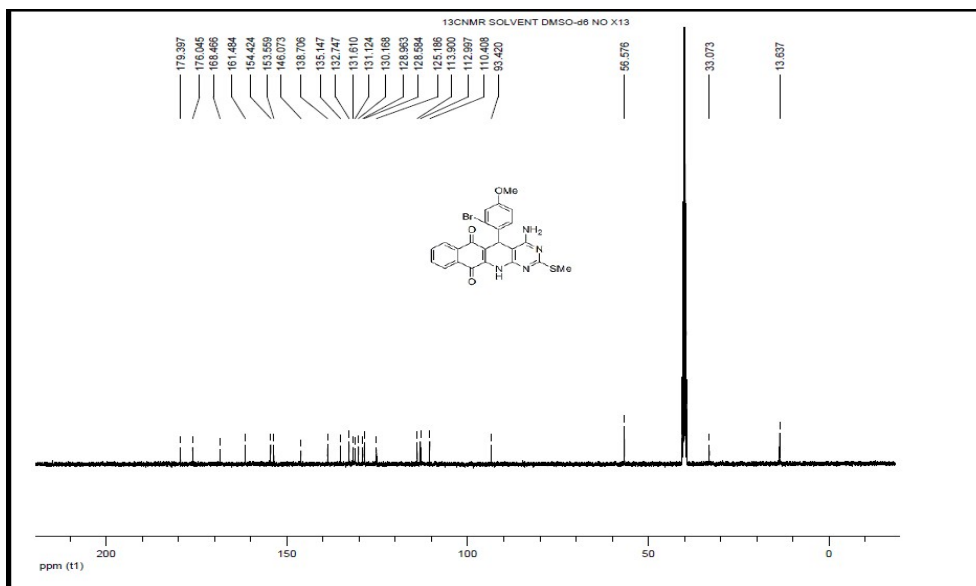

Figure 75  $^{13}\text{C}$  NMR of 4s

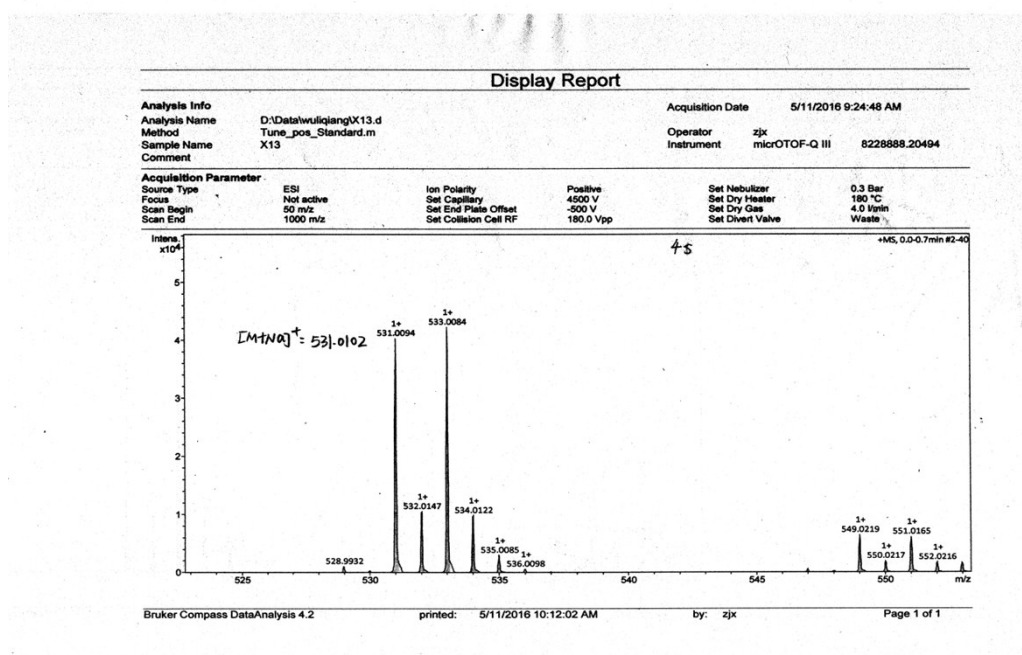

Figure 76 HRMS of 4s
